# Supplementary material for: Discovery of novel representatives of bilaterian neuropeptide families and reconstruction of neuropeptide precursor evolution in ophiuroid echinoderms
Source: PubMed Central journal article supplement (PMC5627052; doi:10.1098/rsob.170129), 2017-09-06
Supplement: rsob170129supp11.pdf [file rsob170129supp11.pdf]

AN peptide

Op\_exim\_1 METRIALISVTFVLLAHISGAPVEEQLEEDKRGNYLSGPGRSRGRN---GKRAEGDEIVD-EVADFANLA-DETDEEKRGNMHLQGGG---RAR  
Op\_exim\_2 METRIALISVTFVLLAHISGAPVEEQLEEDKRGNYLSGPGRSRGRN---GKRAEGDEIVD-EVADFANLA-DETDEEKRGNMHLQGGG---RAR  
Am\_laud MESRIFLLSLAFVLLAQISGAPVDNELEEEKRANFHQNGNGRSRGRGK--PKR-DGE-IVD-EINEIAQLIDDETDEEKRGNMHYTGGRGKAG

Op\_exim\_1 GR-NRNGKRAEGDENFELDFLDSEEKR-----GNRYMT--GTGG-RQGRNGKRT-DEELQE  
Op\_exim\_2 GR-NRNGKRAEGDENFELDFLDSEEKR-----GNRYMT--GTGG-RQGRNGKRT-DEELQE  
Am\_laud GR-GRTGKRD--DEGFDEDFDIDEDKRGNRHLTGGGAAGCRRRKQGKRDDEGEFETDLDLEQDKRGNMHLAGAGRGGSRGRNRGCKRD-DGEFDE

Op\_exim\_1 LLDEEDKRGNMYLQG-GKQRGR---NGKRAD----EDAEALNMEELLEDEKRRKYVLERW-----  
Op\_exim\_2 LLDEEDKRGNMYLQG-GKQRGR---NGKRAD----EDAEALNMEELLEDEKRRKYVLERW-----  
Am\_laud EGEEAEKRGNMYLQGVGNRRGRGRGKCKRTDGEPE-EDA----LDALLNDDEKRGNMFLAGGGRGGRRGKCK

Calcitonin (short)

```

Am_cipu      MRTSLAITIIVCSALYYAVTLVSG--LEKRSF--IVDE-TLPLTGDDFRILADKVDLYNNLIGHLQNFPEQ--F-KRGS--EKG_CAG-FSG_CAQ
Am_cons_1    MRTSLAITIIVCSALYYAVTLVSG--LEKRSY--IVNEESLPLTGDDFRILADKVDLYNTLISTLQDKFPEQ--F-KRGT--EKG_CAG-FSG_CAQ
Op_filo      MRTSLAITVAVCSALYYAVTLVSG--LEKRSF--IDDDALLPLTGDDFRVLADKVDIYNALISRIASQFPEQ--F-KRGS--DKG_CAG-FSG_CAQ
Mi_grac      -----LPLTGDDLRILADKVDIYNALISRVATKFPEQ--F-KRGT--EKG_CAS-FSG_CAQ
Am_squa      MRTSLAITVAVCSVLYYAVTLVYG--LEKRSF--IDDEALIPLTGDDLRVADKIDLYNALISHIANKYPEQ--I-KRG----TG_CKG-FAA_CAQ
Op_resi      MRTSLAITIIVCSALYYAVTLVSG--LEKRSY--IDNASSLPLTGDDLRVLADKVDLYNALISHIESKFPEHMGF-KRGGG-GKG_CAS-FTG_CAQ
Op_savi      MRTSLAITIIVCSALYYAVTLVSG--LEKRSY--IDNASSLPLTGDDLRVLADKVDLYNALISHIESKFPEQ--F-KRGG--GKG_CAG-FTG_CAQ
Op_abys      MRTSLAITIIVCSALYYAVTLVSG--LEKRSY--IDNESSLPLTGDDLRILADKVDLYNALISHIESKFPEQ--F-KRGG--DKG_CAG-FTG_CAQ
Op_angus     MRTSLAITIIVCSALYYAVTLVSG--LEKRSYNLIEQESSLPLTGDDLRVLADKVDIYNALISHIESKFPEQ--F-KRG----KG_CRG-FTG_CAH
Op_caes      MRTSLAITIIVCSALYYAVTLVSG--LEKRSYNTIDKESSLPLTGDDLRVLADKVDIYNALISHIESKFPEQ--F-KRG----KG_CGG-FTG_CAQ
Op_scha      MRTSLAITIIVCSALYYAVTLVSG--LEKRSY--IDDE-TLPLTGDDLRILADKVDLYNALIAHIENKFPEQ--F-KRGT--EKG_CAG-FSG_CAQ
Op_lame      MRTSLAITIIVCSALYYAVTLVSG--LEKRSY--IDDE-TLPLTGDDLRILADKVDLYNALIAHIENKFPEQ--F-KRGN--EKG_CSG-FSG_CAQ
Op_impr      MRTSLAITIIVCSALYYAVTLVSG--LEKRSY--IDDESTLPLTGDDLRVLADKVDLYNALIAHIQNKFPEQ--F-KRGS--EKG_CSG-FSG_CAQ
Op_vall      MRTSLAITIIVCSALYYAVTLVSG--LEKRSY--ID-EPVLPLTGDDLRVLADKVDLYNALIFRIQTQFPEQ--F-KRGG--ERG_CAG-FSG_CAQ
Op_brev      -----SS--LEKRSY--IDDNIALPLTGDDLRILADKVDLYNALISEIHSQFPEQ--F-KRGG----G_CRA-FGG_CAQ
Op_brev      -----SS--LEKRSY--IDDNIALPLTGDDLRILADKVDLYNALISEIHSQFPEQ--F-KRGN--EKG_CSG-FSG_CAQ
Ba_hero      MKTSLAITIIVCSALYYAVTLVSG--LEKRSY--IDDETALPLRGNDRILADKVDLYNALIAHVENQFPEQ--F-KRGG--EG_CSG-FSG_CAQ
Cl_cana      -----SALYYAVTLVSG--LEKRSY--IDDETRLPLTGNDLRVLADKVDLYNAFIAHIENQFPEQ--F-KRGG--EG_CSG-FSG_CAQ
Op_liod      MRTSLAITIALCSALYYAVTLVSG--SERRSY--VDETSPLTGNDIRVLADNVLDLYNALIAHIQNFPEQ--FIKRDG--SG_CRG-FSG_CAQ
Op_prol      MRTSLAITIIVCSALYYAVTLVSG--LERRSY--IDDQTTLPLTGDDLRVLADKVDLYNALILHVQNFPEQ--FIKRGNGDNGG_CKG-FSG_CAQ

```

```

Am_cipu      LAAGQSALQAMIHGNRASLFGS-GGPCKRKRS-AD-----EA--
Am_cons_1    LAAGQSALQAMIHGNRASLFGS-GGPCKRKRS-TD-----EA--
Op_filo      LAAGQSALQAMIHGNRASLFGS-GGPCKRKRS-AE-----EA--
Mi_grac      LAAGQSALQALIHGNRASLFGS-SGPCKRKRS-AE-----EA--
Am_squa      LADGQSALQAMIHNNRASLFGS-SGPCKRKRS-AEL-----EA--
Op_resi      LEAGQSALQAMIHANRASLFGS-SGPCKRKRS-AE-QQQPEQEA--
Op_savi      LEAGQSALQAMIHANRASLFGS-GGPCKRKRS-AE--QQPEQEA--
Op_abys      LAAGQNALQAMIHANRASLFGS-SGPCKRKRS-ADQQQQMQQEA--
Op_angus     LDAGQ TALQAMIHADRASLFGS-DGPCKRKRS-VD---QTQQDA--
Op_caes      LDAGQNALQAMIHANRASLFGS-SGPCKRKRS-TD---QVQRDA--
Op_scha      LAAGQSALQAMLHGQRASLFGS-SGPCKRKRS-AE-----EA--
Op_lame      LAAGQSALQAMIHGNRATLFGS-GGPCKRKRS-AE-----EA--
Op_impr      LAAGQSALQAMIHGNRASLFGS-GGPCKRKRS-TD-----EA--
Op_vall      LAAGQSALQAMIHGNRASLFGS-GGPCKRKRS-AE-----EA--
Op_brev      LAIGQNAVRNLIHSNRASIFSSPRGPCR-----
Op_brev      LAAGQSALQAMIHSGRASLFGS-SGPCKRKRS-AE-----EA--
Ba_hero      LAAGQSALQAMIHSGRASLFGS-GGPCKRKRS-AE-----EA--
Cl_cana      LAAGQSALQAMIHGNRASLFGS-GGPCKRRKRLAE-----EA--
Op_liod      LAAGQSALKAMLHHGRASLFGS-TGPCKRRRS-AE-----EA--
Op_prol      LAAGQSALQAMIHSGRASLFGS-GGPCKRKRS-AE-----EA--

```

Calcitonin (long)

Am\_cipu MRTSVAITIAVCSALYYAVTLVSGLEKRSF--IVDE---TLPLTGDDFRILADKVDLYNNLIGHLQNOFPEQFKRGG-GGCRGFSAQAQLAIGQD  
Am\_cons\_1 MRTSVAITIAVCSALYYAVTLVSGLEKRSY--IVNEE--SLPLTGDDFRILADKVDLYNTLISTLQDKFPEQFKR-G-GGCRDFSAQAQLAIGQD  
Op\_savi MRTSVAITIAVCSALYYAVTLVSGLEKRSY--IDNAS--SLPLTGDDLRVLADKVDLYNALISHIESKFPEQYKRGG-GGQWYFGGCAQLVIGQN  
Op\_angus MRTSVAITIAVCSALYYAVTLVSGLEKRSYNLIEQES--SLPLTGDDLRVLADKVDIYNALISHIESKFPEQFKRGG-GGCKHFTGCAQLVIGQN  
Op\_caes MRTSVAITIAVCSALYYAVTLVSGLEKRSYNTIDKES--SLPLTGDDLRVLADKVDIYNALISHIESKFPEQFKRGG-GGCKHFTGCAQLVIGQN  
Op\_impr MRTSVAITIAVCSALYYAVTLVSGLEKRSY--IDDES--TLPLTGDDLRVLADKVDLYNALIAHIQNKFPQLKRGG-GGCKSFSGCAQLVIGQN  
Ba\_hero MKTSVAITIAVCSALYYAVTLVSGLEKRSY--IDDET--ALPLRGNDLRILADKVDLYNALIAHVENQFPEQFKR-G-GGCRGFSGCAQLAEGQN  
Op\_wend MRTSVAITIAVCSALYYAVTLVSGLEKRSY--TDETPATLPLTGNDLRVLADKVDLYNALIAHIETQLPEQFKR-G-GGCKGFSGCAQLAEGQN  
Cl\_cana -----SALYYAVTLVSGLEKRSY--IDDET--RLPLTGNDLRVLADKVDLYNAFIAHIENQFPEQFKR-G-GGCKGFSGCAQLTEGQN  
Op\_prol MRTSVAITIAVCSALYYAVTLVSGLEKRSY--IDDQT--TLPLTGDDLRVLADKVDLYNALILHVQNOFPEQFKR-G-WGCKVFGGCAQLVEGQN  
As\_tubi MRTSVALTVAICSVMYAVTLVSGFEKRSY--IDYEP--TLPLSGENLRELASNVDLYNNILTRVVNQYPEEFKR-G-GGCRGFSGCAQLAEGQS  
As\_bidw MRTSVALTVAICSVMYAVTLVSGFEKRSY--IDYEP--TLPLSGENLRELASNVDLYNNILTRVVNQYPEEFKR-G-GGCRGFSGCAQLAEGQS  
Op\_oedi MRTSVALTVAVCSVMYYAITLVSGFEKRSY--IDYEP--TLPLSGEDLRVLASNVDLYNNILTRVVNQYPEEFKR-G-GGCRGFSGCAQLAEGQS  
As\_love MRTSVAIIIAVCSIMYYAVTMVSGFEKRSY--IDDEP--TLPLSGEDLRILADNVLDLYNNILTRVVNQYPEQFKR-G-GGCRGFSGCAQLAEGQS

Am\_cipu AFRNMMHNNRASLFTSARGPGRRKRSIDQQ--QVLPLTGDEFRLADQVELYNDILGQIASTNLQOF-KR-GSER-GCAGFSGCAQLAAGQSALO  
Am\_cons\_1 AFRNMMHKNRASIFTSARGPGRRKRSIDQQ--QVLPITGDEFRLADEVELYNDILSQAISTNLKQF-KR-GTEK-GCAGFSGCAQLAAGQSALO  
Op\_savi AVRNMIIHNNRASVFSPPYGPGRKRKRSVSSG--DVLPMSSNDFKLLADDVELYKIDILGQITANSKQF-KRGGGK--GCAGFTGCAQLEAGQSALO  
Op\_angus ALRNMMHKNRASVFKSPYGPGRKRKRSVSSG--DELQIPNDYRILADDVELYNDILGQITANSNEF-KR--GK--GCRGFTGCAHLDAGQTALQ  
Op\_caes ALRNMMHKNRASVFKSPYGPGRKRKRSVSSG--EELQIPNDYRILADDVELYNDILGQITANSNEF-KR--GK--GCGGFTGCAQLDAGQNALQ  
Op\_impr AVRNLIIHNNRASIFSSPRGPGRRKRSVDDVQTEQVLPISGDDFRILADELELYSAILGQMGTRNPKQF-KR-GSEK-GCSGFSGCAQLAAGQSALO  
Ba\_hero AVRNLMIHNNRASVFSGRGPGGRKRKRSVDDQTEQYLPITGDDLRILADEVDLYNAVIKQIASTYPEQF-KR-GGE--GCSGFSGCAQLAAGQSALO  
Op\_wend ALRNLMHLNRRASVFSGRGPGGRKRKRSVDDQTEQYLSITGDDLRILADEVDLYNAVLNQIATKYPEQF-KR--GE--GCSGFSGCAQLAAGQSALO  
Cl\_cana AVRNLMSNRRASIFSGRPGPGGRKRKRSVDDQTEQYLPITGDELRLADEVDIYNAVISQIASQYPEQF-KR-GGE--GCSGFSGCAQLAAGQSALO  
Op\_prol ALRNLIILSNRAAIFSSPLGPGGRKRKRSVDDQIEQLLPITGDELRLTAGEVDLYNAIISPIATIYPEQFI-KRGNNGDNGGCKGFSGCAQLAAGQSALO  
As\_tubi ALRNMMHNNRRASMFSGAGGPGGRKRKRSINDQ--SLLPITGDDLRITVADEVDLYNAIISQTAIRYPEQF-KR--GE--GCKGFSGCAQLAAGQSALO  
As\_bidw ALRNMMHNNRRASMFSGAGGPGGRKRKRSINDQ--SLLPITGDDLRITVADEVDLYNAIISQTAIRYPEQF-KR--GE--GCKGFSGCAQLAAGQSALO  
Op\_oedi ALRNMMHNNRRASMFSGAGGPGGRKRKRSINDQ--SLLPITGDDLRITVADEVDLYNAIISRTAISYPEQF-KR--GE--GCKGFSGCAQLAAGQSALO  
As\_love ALRNMMHNNRRASIFSGATGPGKKKRSIDQ--SVPITGNDLRVVADEVDLYNAIISRTAISYPEQL-KR--GE--GCKGFSGCAQLAAGQTALQ

Am\_cipu AMIHGNRASLFGSGGPGK-RKRSADEA-----  
Am\_cons\_1 AMIHGNRASLFGSGGPGK-RKRSTDEA-----  
Op\_savi AMIHANRASLFGSGGPGK-RKRSAEQQPEQEA  
Op\_angus AMIHADRASLFGSDGPGK-RKRSDVDT-QQDA  
Op\_caes AMIHANRASLFGSSGPGK-RKRSTDQV-QRDA  
Op\_impr AMIHGNRASLFGSGGPGK-RKRSTDEA-----  
Ba\_hero AMIHSGRASLFGSGGPGK-RKRSAEEA-----  
Op\_wend AMIHNGRASLFGSGGPGK-RKRSAVEA-----  
Cl\_cana AMIHNGRASLFGSGGPGKRRKRLEAEA-----  
Op\_prol AMIHSGRASLFGSGGPGK-RKRSAEEA-----  
As\_tubi AMIHNNRAPLFGSSGPGK-RKRSAEEV-----  
As\_bidw AMIHNNRAPLFGSSGPGK-RKRSAEEV-----  
Op\_oedi AMIHNNRAPLFGSSGPGK-RKRSAEEV-----  
As\_love AMIHNNRAPLFGSSGPGK-RKRSAVEVSK---

CCK 1

Am\_cons\_1 -----P L L L A I A C L F L T P A A T L P S K T G K ---TRDLSHTDIERLILNTIETVESQAINRKS G T T N D E E V G G T P W K A E N T W K T P T L P D L I K D W K E S V K E R Q E N L  
Am\_cons\_2 MTGDVLP L L L A I A C L F L T P A A T L P S K T G K ---TRDLSHTDIERLILNTIETVESQAINRKS G T T N D E E V G G T P W K A E N T W K T P T L P D L I K D W K E S V K E R Q E N L  
Am\_squa MTGDVLP L L L A I A C L F L T P A A T L P S K T G T ---SRDLSHTDIERLILNTIETVEAKAVNRDRGDSNDDEEVGGTPWKADNTWKTPTLPDLIKDWKESVKERQENL  
Op\_savi MTGDVLP L L L A I A C L F L T P A A S L P S K T G N S K S S R D I S H T D L E R L I L N T I E T V E T Q ---NR----PHDEETEGTPWKSEN---TPTLPDLIKDWK----ERRESL  
Op\_abys -----G N S K S S R D I S H T D L E R L I L N T I E T V E T E A L N R ---PHDEETEGTPWKAEN---TPTLPDLIKDWK----ERREN L  
Op\_angu MTGDVLP L L L V A T A C L F L S S C A A L P S K T G N T K L G R D I S H T E L E R L I L N T I E T V K N Q A F S R ---ADEEETEGTSWDNEN---TPTLPDVLKDW T ----GRHKS L  
Op\_reti -----T V E A Q A I N S R Q --THD-EVEGTPWKAENTWKTPTLPDLIKDWKESVKERQESL  
Ba\_hero -----I A C L F L T P A A S L P S K T G N S K A S R D I S Q T D I E R L I L N T I E T V Q A Q A L N R Q S G -T H D -E V G G T P W K A E N T W K T P T L P D L I K D W K E S V K E R H E S L  
Op\_perf MTGDVLP L L L A L V C L F L T P A A S L P S K S G N S K A S R D I S Q T D I E R L I L N T I E T V Q A Q A I N R Q S G -T R D -E --G T P W K V E N T W K T Q T L P D L I K D W K E N V Q E R Q E S L  
As\_love -----C L F L T P A A S L P S K T G S L K A G R D I S Q T D L E R L L L N T I A T A Q V Q V I N R Q S G -T H D -K L G D T -W K A E N T W K T P T L P D L I K D W K A S V K E Q Q D N L

Am\_cons\_1 -AEND-LLRDVPETD---RNLNDKRS--RDYGWGMAFCKRGSRTQKER-----LQTFNKE--YWGTFFFGKR--N-EYGWGHMFGKR--D-EEDIDYDDFVA-  
Am\_cons\_2 -AEND-LLRDVPETD---RNLNDKRS--RDYGWGMAFCKRGSRTQKER-----LQTFNKE--YWGTFFFGKR--N-EYGWGHMFGKR--D-EEDIDYDDFVA-  
Am\_squa -AEND-ILRDLVPDADLSDLNEKRS--RDYGWGMAFCKRGSRTQNER---HKMETFNKE--YWGTFFFGKR--G-EYGWGHMFGKRNVN-EDEVYDDFVA-  
Op\_savi AAGDN-FLRGLEEDD---ADIVDKRG--KDYGWGFLMCKRNSRTQSQRQSFQMESKRDH-MYWGTFFFGKRSGDSKYGWGQFFGKR--NGDEEVDYDDFVAL  
Op\_abys -AGNN-LLGDIEEDD---TDIIDKRG--KDYGWGFLMCKRSSWTQSKRQOSYKMQTKKDSPNYQWGMTFFGKR--NHNYGWGQIFGKR--D-NEEADYDDFVAL  
Op\_angu -ADNK-LLNGFSEDDA--VNLLDKRSRPKDYNWGILFKRSQLSHRQREQDFKVEFKSN-DYGLGLLFFGKR--NGQYGCNLFCKR--DVADDGDYDDFVAL  
Op\_reti -AENDLLLGDIADED---TDITEKRN--RDYGWGMAFCKRGSRTQNRQ-SHKVESFNKE--YWGTFFFGKR--N-EYGWGHMFGKR--D-EEQVDYDDFVA-  
Ba\_hero -AEND-LLRDIPEED---EDIAEKRN--RDYGWGMAFCKRGSRTQNRQ-SHKMETFNKE--YWGTFFFGKR--N-EYGWGHMFGKR--D-EEQVDYDDFVA-  
Op\_perf -AEND-LLRDLPQDD---EDIMEKRN--RDYGWGMAFCKRGTRTQNRQ-SHKMETFNKE--YWGTFFFGKR--N-EYGWGHMFGKR--D-EEQVDYDDF---  
As\_love -AEHG-IFQDIPEE---EGLNDKRS--RDYGWGMAFCKRGSRTQNERQ-NHKMETFNKE--YWGTFFFGKR--N-EYGWGHMFGKR--N-EEQMDYDDFVA-

Kisspeptin

Am\_squa MRSCCMSRRILPLAWFICFSVAFPLRSLIAENRNLDQNDISSLLVADEDQEHSSDLGFQSANILLDVIERILDRLESSAVPPLQ--ETNDFLQSAP-ETSWPPLENDFLS  
Op\_resi MRSCFML-RILPVA-FICF--FGLPILSIADSRNLDQ-DIP-LIVREEEESNSSDLGLQSASILLDAIERLLNRLDSSAVPP----QDNDI-QRAP-ETSWPPLENDFLS  
Op\_savi MRSCFML-RILPVA-FICF--FGLPLLSIADSRNSDQ-DIP-LIVREGEEELNSSDLGLQSASILLDAIERLLNRLDSSAVPP----QDNDI-QRAP-ETSWPPLENDFLS  
Op\_abys MRSCFLL-RILPVA-FICF--FGLPILSIADSRNSDQ-DIP-LIVREEEEPHSTDFELQSTGFVLDALERLLHRLDASAVPP----QDNDI-QSAPGETSWPPLENDFLS  
Op\_reti -----EQQNSPDYGLHSANILLDVIERILDRLESSAVPP----EDNDI-HSAP-ETSWPPLENDFLS  
Op\_impr MSCCSML-RIVPVA-VICF--FVLPFLSIADDRNSDQ-DIP-LVAAEEDQNSDFGLHSASILLNVIERILDRLESSAVPP----QDNDI-YSAP-ETSWPPLENDFLS  
Op\_fune -----LICS--LGLPVISSADTRSTDQ-DIP-FF-RGEEQENPSDFGIHSTSFLFDVIERILDRLESSALPP----QDNDI-NIAP-ETSWPPLENDFLS  
As\_bidw MRSCSML-RILPVA-LICS--LGLHVLCSGD-RNTQQ-DLP-LN-RGEQQQNP SGFRLHSADILLDVIEQIVDRLESSALPP----SDNDI-YNAP-ETSWPPLLEQDMLS  
Op\_oedi -----LEQDMLS  
As\_love MRSCSML-RILPVA-LICS--LGLPVLCSGD-RHTEQ-DTS-LN-RGDEQQNSDFGLHSASILLDVLERILDQMDSSAVPP----NENDI-YSPP-DASWPPLERDMLS

Am\_squa RDVIYLPKSSSSSNTVTLG-ITSIGSRHRGFAP\_NKG-LORVIRG--RR\_R--NANAGARMLPFCKRSNTVRNS-EDSGTSSV-RCRRRGRGRPRSRGS---FP-PQKLPFCRRL  
Op\_resi RDHIYLPK-SSSNALKLKHMTSYGKSQR---TSCTEGFLORVIRG--R-----NPNAGARALPFCKRGGNKRNSGDESGTSSV-RCRRRGRGRPP-----PVPRRQRQLPFCKRRV  
Op\_savi RDHIYLPK-SSSNALKLKHMTLYDKSQR---TSCSEGFLORVIRG--RG-RG-NANAGARALPFCKRGGNKRNSGDESGTSSV-RCRRRGRGRPRSRGI--POP-QQKQLPFCKRRV  
Op\_abys RDHIYLPK--SSSNALKFG-MTSYGKSQR---ASCSGGIICRVIRG--RGGRG-NVNAGARALPFCKRGGNKRNSGDESGTSSV-RCRRRGRNRPRSRGSSNGFP-QQNKLPFCRRL  
Op\_reti RDHTYLPK--SGTNSLMLG-MTSYGSRH----VPCSGG-LORVIRG--RQ-RGNNVNAGARALPFCKR-ANVRNS-DEASTSSV-RCRRRGRGRPRSRGS--SYP-QQNKLPFCRRL  
Op\_impr RDHVYLPK--SSSNALTFG-VTSYGNQR---TSCSEG-LORVIRG--RQ-RG-NANAGARALPFCKR-GSVRNS-DD-GTSAV-RCRRRGRGRPRSRGSL-GYP-KQ-KLPFCRRL  
Op\_fune RDHVYLPK--SSSKALTIG-VTSYGNWQR---APCT-GIMCRVTRG--KY-RG-NINAGARALPYCKR-----  
As\_bidw QEPLYPPM--SSGNGLTYG-MTSYEKRQQ---APCN-DMMCAMKRGSRRQ-RI-NPNVNGNMLPFCKR-SDARNS-DEAGMRSV-RCRRRGRGRPRTRGQ-----QQKLPFCRRL  
Op\_oedi QEPLYPPM--SSGNGLTYG-MTSYENRQQ---APCN-DVMCAMKRG--RQ-RI-NPNVNGNMLPFCKR-SGARNNS-DEAGMRSV-RCRRRGRGRPRTRGH-----QQNKLPFCRRL  
As\_love QDPLHPPK--SLSNDLTFS-MTSYEKRQQ---APCN-DVMCRMVRG--KQ-RV-NANAGSRMLPFCKR--DNRNS-DEAGMRSV-RCRRRGRGRPRTRGH-----QHNLKLPFCRRL

NG peptide

Am\_cipu -----SPVGSSGNS-IQWTKDDNINKLRKEIIASLPADIPAILLKPQTQENKEDT-PQDWTA  
Am\_cons\_1 MALGIKFYTIILNLILVLLAARTIFGEVNTHETSNKVRRSVAVGSSGNS-IQWTKDDNINKLRKEIIASLPADIPAILLKPQTQENKEDS-PQDLTA  
Am\_cons\_2 MALGIKFYTIILNLILVLLAARTIFGEVNTHETSNKVRRSVAVGSSGNS-IQWTKDDNINKLRKEIIASFPADIPAILLKPQTQENKEDS-PQDLTA  
Op\_filo --VGIRYCVIFNLILVLLAARTIFGEVNTHDISHKVRRSVAVGSSVNS-FQWTTDDNINKLRKDILASIPDDIPAILL----QDDQEDT-PQDLTA  
Mi\_grac MAVGIRYYAILNLILVLLAARTIFGEVHTQDSTHKVRRSPVGTSVNS-FQWTKDDNINKLRKDILSSIPDEIPAILFNPQTQEDEKDT-LQDLA  
Am\_squa MAVGIRYYAIFNLILVLFATQTVFGEVNTHESSNKVRRSPVGSFVNS-FQWTKDNNINKLRKDILASIPADYQAALLKHSSEEQEDT-PQDLAA  
Op\_resi MAVGIRY-AILNLVLVLAARTIFCELHTQDSTHKVRRNTAGVSGNS-NQWTKDDNIHKLROEIIASLPADLPAYLLNPKIHESKDQGTSEQELSA  
Op\_savi MAVGIRY-AILNLVLVLAARTIFCEIHTKDSTHKVRRNTAGVSGNS-NHFTKDDNIHKLTOELIASLPADHPAYLLNPKIHESKDQGTSPELSA  
Op\_abys MAVGIRS-AILNLVLVLAARTIFCEVHTEDLTHKVRRTIGVPGNS-NQWTKDNNIHKLROEIIAALPADLPAYLLNPKIHESKDQGTSPELSA  
Op\_angu MAGGIRH-VILNLLLVLIAARISVSELHISDATQKVRRTSTGGITGNS-NQWTKDESINKLRQDFIASLPGNLPAYLIDSKLLKGDVSPALT-  
Op\_caes MAGGIRH-AILNLLLVLIAARISVSELQISDATHKVRRTYGGITGNS-NQWTKNESINKLRQELIASLPANLPAYLLHSKISEGNDKDLSPELSA  
Op\_reti MAVGIRY-AILNLILVLAARTTFGEVNTHDSSHKVRRTGDSSGNS-LQWTKDNNIDKLRKEIFASLPADLPVLLNSQTHEGAEGT--HDLA  
Op\_lame MAVGIRY-AILNLILVLAARTTFGEVNTHDSSHKVRRTGDSSGNS-LQWTKDNNIDKLRKEIFASLPADLPVLLNSQTHEGKEGT--QDLA  
Op\_impr MAVGIRY-AILNLILVLIAGRTIFGEVITHDSTHKVRRNTDGPSTGNS-IQWAKDDNIDKLRKEIIASLPADLPVLLKSPOTHERKEGT--QDLST  
Op\_vall MAVGIRY-AILNLILVLLAVRTIYGEDNTHELTKKVRRDTGGSSGHSQTQWTKDNNINKLRKEIFA---DLPAILLQSQTHEGSHLQELSA  
Op\_brev MAVGIRY-AIFNLILVLLAARTIYGNEDTHDLTKKVRRTIDSSANS-NQWIENDNIDKLRKEIFASFPADIPAILLKSQTHEESEGTHNIKDLPA  
Ba\_hero MAVGIRN-AILNLILVLFARTIFGETNTNDLTHKVRRTDGGSSGHS-NHWTKNDNIDKLRKEIFASLPADLPGILLNSKTHETQEGTHDLDLSP  
Op\_wend -----KNDNIDKLRKEIFASLPADLPGILLKSKIHASQEGTQTDLDLSP  
Cl\_cana -----  
Op\_exim\_1 -----  
Op\_liod -----  
As\_tubi -----L---TRYGEIRV-----GTRDTQ-TIGQKKNNVNKFRNEILASLPANLPNILLDSQTRDTESTQ-TEELSP  
As\_bidw -----L---TRYGEIRV-----GTRDTQ-TIGQKKNNVNKFRNEILASLPANLPNILLDSQTRDTESTQ-TEELSP  
As\_bidw -----L---TRYGEIRV-----GTRDTQ-TIGQKKNNVNKFRNEILASLPANLPNILLDSQTRDTESTQ-TEELSP  
Op\_oedi MAVGIRY-AILNLILVLFVAA-TLFGIIVTDDLTYKVRRTDGGNSGHS-NYWSKKNNVNQFRNEILASLPANLPNIILDSQTRDTESTQ-TEELSP  
Op\_oedi MAVGIRY-AILNLILVLFVAA-TLFGIIVTDDLTYKVRRTDGGNSGHS-NYWSKKNNVNQFRNEILASLPANLPNIILDSQTRDTESTQ-TEELSP  
As\_love MAVGIRY-AILNLILVLFATSSIFGEIIVTDDLTYKVRRTDGGTSENS-KYWSNNNNIDEFRNEILASLPADIPSIILLNSQTRTKSTQ-TEELSP

Am\_cipu L--EQ--VGKVAAGQAIDA--DGRDN--LYNFLSRQSAR--NNYQ--GLE-----SKRNGFFFGRKNGFFFGRDTEAVKSDSCVSCGPQNSGQC  
Am\_cons\_1 L--EQ--VEKVAIGQAIDA--DARDN--LYNFLSRQSAR--NNYQ--GLE-----SKRNGFFFGRKNGFFFGRDTEAVKSDSCVSCGPQNSGQC  
Am\_cons\_2 L--EQ--VEKVAIGQAIDA--DARDN--LYNFLSRQSAR--NNYQ--GLE-----SKRNGFFFGRKNGFFFGRDTEAVKSDSCVSCGPQNSGQC  
Op\_filo L--KQ--VGRVTGGRAITNT-DARDN--LFHFLSRPSGR--NNYQ--EGLQ-----SKRNGFFFGRKNGFFFGRDTEAVESNL\_CVRCGPENSGQC  
Mi\_grac L--EQ--VGRVASGHTITD--DARDN--LLHFLSRQTARNNNHQEGLE-----SKRNGFFFGRKNGFFFGRDTEAVKSDL\_CVRCGPDNSGQC  
Am\_squa L--DQ--VGRL--GHET----DARDD--LIHFLSRQSAWNNNHEAGIE-----SKRNGFFFGRKNGFFFGRDTEAVNSDL\_CTS\_CGPHSAGQC  
Op\_resi LK--QQ--VENFANIRGN----DANDNLALQTYLSKHPAR--NNNQEGLD-----KRNNGFFYGKRNNGFFFGRDTEAVESNS\_CIK\_CGPNNSGQC  
Op\_savi LK--QQ--VENFANKYGN----DESDNLALQTYLSKLLAR--NNHIEGLE-----KRNNGFFYGKRNNGFFFGRDTEAVESNS\_CIK\_CGPNNSGHC  
Op\_abys LK--QE--VENFADVNGN----DASDNLAVQTYLSRHPAW--NNYQ--EGLD-----KRNNGFFYGKRNNGFFFGRDTEAVDYN\_SCI\_CK\_CGPNNSGQC  
Op\_angu ---QP--VEHFTDGN-----NAIDNLRLPAYLSRHPSR--NHFEEALD-----KRNNGFFYGKRNNGFFFGRDTEAVESK\_SCI\_CIR\_CGPDDSGRC  
Op\_caes LT--QP--VEHFTDGN-----NAIDNLRLPTYLPRHPSR--NQYEEALD-----KRNNGFFYGKRNNGFFFGRDTEAVEQ\_SCI\_CIR\_CGPND\_SGRC  
Op\_reti L--EQ--VENVA--GQGNDN--DARDKLALYNYLSRQSAR--NIYQ--EGLD-----KRNNGFFFGRKNGFFFGRDTEAVKSDL\_CVPCGPQNSGQC  
Op\_lame L--EQ--VENIA--GQGN--DARDKLALYNYLSRQSAQ--NIYQ--EGLD-----KRNNGFFFGRKNGFFFGRDTEAVESDSCVH\_CG\_CGPQNSGQC  
Op\_impr L--EQ--VENVA--GQANDN--DARDKLALYNYLSRQPAR--NIYQ--EGLD-----KRNNGFFFGRKNGFFFGRDNEAVKSDSCVSCGPQSSGQC  
Op\_vall L--QH--VGSVA--GVDNQ--DAKDKLALYNYLSRQPAR--NIYQ--EGLD-----KRNNGFFFGRKNGFFYGKRDTE\_TVKSDSCIS\_CG\_CGPQNSGQC  
Op\_brev L--EH--TESVA--GLGNTK--EARDKLALYNYLSRQPSR--NIYQ--EGLD-----KRNNGFFFGRKNGFFFGRDTEAVKSNY\_CVSC\_CGPEKSGRC  
Ba\_hero L--EL--VGNVA--GLESAN--DAREKLALYNYLSRQPAR--NIYQ--EGLD-----KRNNGFFFGRKNGFFFGRGTA\_AVESDSCVSC\_CGPDNSGQC  
Op\_wend L--EQ--VGNVA--GLESAN--DAKEQLALYNYLAKQSAR--NIYQ--EGLD-----KRNNGFFFGRKNGFFFGRDNEAVESDSCVSC\_CGPQNSGKC  
Cl\_cana -----MALYNYLSRQPAR--NIYQ--EGLD-----KRNNGFFFGRKNGFFFGRDTEAVESH\_CVSC\_CGPQNSGQC  
Op\_exim\_1 -----NYLSRQPAR--NIYQ--EGLD-----KRNNGFFFGRKNGFFFGRDTEAVESH\_CVSC\_CGPQNSGQC  
Op\_liod -----MALYNYLSRQPAR--NIYQ--EGLD-----KRNNGFFFGRKNGFFFGRDAKAAESDM\_CVRC\_CGPRNSGQ-  
As\_tubi L--EQVPVGNLQ--GYGSEE--DAREHLDLYNFMSRNPAPAR--SVYRDESH-----KRNNGFFFGRKNGFFFGRDVEAVSSDSCVSC\_CGPENDGQC  
As\_bidw L--EQVPVGNLQ--GYGSEE--DAREHLDLYNFMSRNPAPAR--SVYRDESHKRNNGFFFGRKNGFFFGRKNGFFFGRDVEAVSSDSCVSC\_CGPENDGQC  
As\_bidw L--EQVPVGNLQ--GYGSEE--DAREHLDLYNFMSRNPAPAR--SVYRDESH-----KRNNGFFFGRKNGFFFGRDVEAVSSDSCVSC\_CGPENDGQC  
Op\_oedi L--EQVPVGNLQ--GYGSED--DAREHLDLYNFMSRNPAPAR--SVYRDESH-----KRNNGFFYGKRNNGFFYGKRDVEAVSSDSCVSC\_CGPENDGQC  
Op\_oedi L--EQVPVGNLQ--GYGSED--DAREHLDLYNFMSRNPAPAR--SVYRDESH-----KRNNGFFYGKRDVEAVSSDSCVSC\_CGPENDGQC  
As\_love L--EQ--VVNVQ--GFGSDN--DAREQLDLYKFMSRNPAPAR--SIYRDESH-----KRNNGFFFGRKNGFFFGRDVEAVTSDSCVRC\_CG\_CPENDGQC

Am\_cipu VMFGTCCSPQFGCYFMTQEASACTTHHI--ANTCWKQD--LMPSC--GRR--GICVADAVCCSPKDGACRIDLSCSMQEQTNIEYKN  
Am\_cons\_1 VMYGTCCGRQFGCYMMTPEASACITHHI--ANTCQKQD--IMPSC--GGR--GICVSDAMCCSPKDGACRIDLSCSKQQQSNIIEYKN  
Am\_cons\_2 VMYGTCCGRQFGCYMMTPEASACITHHI--ANTCQKQD--IMPSC--GGR--GICVSDAMCCSPKDGACRIDLSCSKQQQSNIIEYTK  
Op\_filo VMFGTCCSPQFGCYFMTPEASPCTQRHI--NNSCWRPD--LMPSC--GRR--GVCVADALCCSPNDGVFRIDFS-----  
Mi\_grac VMFGTCCSSKYGCFYFMTPEASPCTQHVI--KNTCWRRD--LMTSC--GRR--GICVAEALCCSPQDGVCRIDLSCSLTPQQNNIDNEM  
Am\_squa VMYGTCCIPQYGCYIMTPEASSCTQHVV--DSSCWRQD--TIRSCGIGRR--GICAGEALCFLPKDGAFRVDLSCSTTQQKNINDKD  
Op\_resi VMFGTCCSAEFGCYFMTKESEACMTPRV---DTCFSQE--KRPTC--SRR--GICVANGICCCSPKDGACKIDAVCRSNAKKTN---  
Op\_savi VMFGTCCSPEFGCYFMNKESEACMTPRV---NTCVSEE--KRPPC--SGR--GICVAPGICCCSPRDGACKIDAVCRSNAKKTN---  
Op\_abys VMFGTCCSPELGCYFMTKESAACMTRV---DTCLSQE--RRESC--SRR--GICVADGVCCSPRDGACKIDASCSSNAKKTTE---  
Op\_angu VGYGMCCSEENGCIYIKTKEAAVCRTPDV---GACLNEE--KPQOC--GVG--GICVADGVCCSPRDGACKPEPKCNIHTKQATE---  
Op\_caes IGYGMCCSEEHGCIYMMTKEAAVCRSAV---STCVSDE--RAKRC--GIR--GICVADGVCCSPRDGACKPEPKCSILTEKATE---  
Op\_reti VMYGTCCSPKFGCYMMTKESEACMSHHA--NNGCWNQE--LMTTSC--GR--GLCVAEVCCSPRDGACKIDLSCST-----  
Op\_lame VMFGTCCSPQFGCYLMTKESEACMSHVV--GNACWDQE--LMTTSC--GRRGLGLCVAEAVCCSPRDGACKIDLSCST--QAKTLGYNE  
Op\_impr VMFGTCCSPQFGCYLMTKESEACMTHHV--GTGCWNQD--LMPSC--GRR--GICVAEAVCCSPRDGACKIDYSCST--QEKTIDYTE  
Op\_vall VMYGTCCSPQYGCYIMTSESEACMRQNLIHSGCWNHE--STPTC--GSR--GICVTDVAVCCSPQDGAICIIDLTCST--QKKTIN---  
Op\_brev VMYGTCCSPQFGCYIMTSEADACKTRHVGTTHSDCWKQE--STPSC--GRR--GMCVSEFCCSPEDRACFIDSSCSL---KTLD---  
Ba\_hero VMFGTCCSGKLGCYLMTTESEACTKHHV--GTGCWNQE--LMQPC--GRR--AMCVAEGVCCSPQDGAACKIDFSCSAAQKKTIE---  
Op\_wend VMFGTCCSPEFGCFLMTQESEPCMKHHV--GTGCFDEG--LTPSC--GRRGLGLCVAKDLCCSPQDGAACKRIDPSCLA--PKKIND---  
Cl\_cana VMFGTCCSLQFGCYEMTEESKACMTHHV--GTGCWDLDELHPPTCD--GRR--GVCVAEAVCCSPQDGAACKIDLSCSA--QTKTID---  
Op\_exim\_1 VMFGTCCSLQFGCYVMTEESKACMTHHV--STGCWDLA-----  
Op\_liod -----  
As\_tubi VMYGTCCSPKFGCYLMTKESEACMSNHV--GRECWDQE--SSPSC--GRG--GLCVTNSICCCSPKASSCHIDVSCST--QTIPLD---  
As\_bidw VMYGTCCSPKFGCYLMTKESEACMTNHV--GRECWDQE--SSPSC--GRG--GLCVTNSICCCSPKASSCHIDVSCST--QTIPLD---  
As\_bidw VMYGTCCSPKFGCYLMTKESEACMTNHV--GRECWDQE--SSPSC--GRG--GLCVTNSICCCSPKASSCHIDVSCST--QTIPLD---  
Op\_oedi VMYGTCCSPKFGCYLMTKESEACMTNHV--GRECWDYE--SSPSC--GRG--GLCVANSICCCSPKASSCHIDVSCST--QTIPLD---  
Op\_oedi VMYGTCCSPKFGCYLMTKESEACMTNHV--GRECWDYE--SSPSC--GRG--GLCVANSICCCSPKASSCHIDVSCST--QTIPLD---  
As\_love VTYGTCCSPKFGCFLMTKESEACLTNHV--GRECWNHE--SSPLC--GRG--GVCVTNNVCCSPQAGSCHIDVSCST--QTTTTTE---



NP18

Op\_filo MQSSNIAALATFFVFAAVFAQAAYSLSYDAPQRSKRLEW-VDKK-A-DASN--PDKRLEWVDKKTPEKRLFWVDKKSP-----EK  
Am\_squa MQSSNIAALATLCVFAVFAQAAYSLSYDAPQRSKRLEW-VDKK-S-DASN--PDKRLEWVDKKTPEKRLFWVDKKSP-----EK  
Op\_resi MQSSNIAALATVFVFAVFAQAAYSLSYNPAERSKRLEW-VDKKSADENSP--IDKRLEWVDKKSPEKRLFWVDKKSPEKRLFWVDKKASPDLEK  
Op\_savi MQSSNIAALATVFVFAVFAQAAYSLSYNPAERSKRLEW-VDKKSADENSP--IDKRLEWVDKKSPEKRLFWVDKKSS-----PELEK  
Op\_abys MQSSNIAALATVFVFAAVFAQAAYSLSYNPAERSKRLEW-VDKKSADADT--VDKRLEWVDKKSPEKRLFWVDKKSPEKRLFWVDKKS-ADLEK  
Op\_angu MQSSNIIALATLFVFAVFAQAAYSLSYNPAERSKRLEW-VDKKSAD--DSP--IDKRLEWVDKKSPEKRLFWVDKKSP-----EK  
Op\_caes MQSSNIIALATLFVFAVFAQAAYSLSYNPAERSKRLEW-VDKKSAD--DSP--IDKRLEWVDKKSPEKRLFWVDKKSPEKRLFWVDKKS-ADLEK  
Op\_fasc MQSSNIAALATIFVFAAVFAQAAYSLSYDAPQRSKRLEW-VDKK-A-ENSQ--PDKRLEWVDKKTPEKRLFWVDKKTP-----EK  
Op\_scha MQSSNIAALATIFVFAAVFAQAAYSLSYDAPQRSKRLEW-VDKK-A-ENSQ--PDKRLEWVDKKTPEKRLFWVDKKTP-----EK  
Op\_reti MQSSNIAALATIFVFAAVFAQAAYSLSYDAPQRSKRLEW-VDKK-A-ENSQ--PDKRLEWVDKKTPEKRLFWVDKKTP-----EK  
Op\_lame MQSSNIAALATIFVFAAVFAQAAYSLSYDAPQRSKRLEW-VDKK-A-EDSQ--PDKRLEWVDKKTPEKRLFWVDKKTP-----EK  
Op\_bisp MQSSNIAALATLFVFAAVFAQAAYSLSYDAPQRSKRLEW-VDKK-A-ENSQ--PDKRLEWVDKKTPEKRLFWVDKKTP-----EK  
Op\_vall MQSSNIAVLATIFVFAAVFAQAAYSLSYDAPQRTKRLEW-VDKKAADNSV--PDKRLEWVDKKTPEKRLFWVDKKSP-----EK  
Op\_brev MQSSNIAALATIFVFAVFAQAAYSLSYDAPQRSKRLEW-VDKKAADNSV--PDKRLEWVDKKTPEKRLFWVDKKTP-----EK  
Ba\_hero MQSSNIAAMATICVFAAVFAQAAYSLSYDTQQRSKRLEW-VDKK-AEDDSL--PDKRLEWVDKKTPEKRLFWVDKKTP-----EK  
Op\_appr MQSSNIAALATIFVFAAVFAQAAYSLSYDTQQRSKRLEW-VDKK-S-EDSL--PDKRLEWVDKKTPEKRLFWVDKKTP-----EK  
Op\_vivi MQSSNIAALATIFVFAAVFAQAAYSLSYDTQQRKRLEW-VDKK-S-EDSL--PDKRLEWVDKKTPEKRLFWVDKKTP-----EK  
Op\_aust MQSSNIAALATIFVFAAVFAQAAYSLSYDTQQRKRLEW-VDKK-S-EDSL--PDKRLEWVDKKTPEKRLFWVDKKTP-----EK  
Op\_cyli MQSSNIAALATIFVFAAVFAQAAYSLSYDTQQRSKRLEW-VDKK-A-EDSL--PDKRLEWVDKKTPEKRLFWVDKKTP-----EK  
Op\_wend MQSSNIAALATIFVFAAVFAQAAYSLSYDTQQRSKRLEW-VDKK-A-EDSLSPDKRLEWVDKKTPEKRLFWVDKKTP-----EK  
Op\_plic MQSSNIAAVLATLFVFAAVFAQAAYSLSYDTQQRSKRLEW-VDKK-A-EDSLSPDKRLEWVDKKTPEKRLFWVDKKTP-----EK  
Op\_fune MQSSNIAVLATLFVFAAVFAQAAYSLSYDTQQRSKRLEW-VDKK-A-EDSLSPDKRLEWVDKKTPEKRLFWVDKKTP-----EK  
Op\_perf MQSSNIAVLATLFVFAAIFAQAAYSLSYDTQQRSKRLEW-VDKK-A-EDSLSPDKRLEWVDKKTPEKRLFWVDKKTP-----EK  
Cl\_cana MQSSNIAVLATLFVFAAIFAQAAYSLSYDTQQRSKRLEW-VDKK-A-EDSLSPDKRLEWVDKKTPEKRLFWVDKKTP-----EK  
Op\_exim\_1 MQSSNIAALATLFVFAAIFAQAAYSLSYDTQQRSKRLEW-VDKK-A-EDSLSPDKRLEWVDKKTPEKRLFWVDKKTP-----EK  
Op\_prol MQSSNIAALATIFVFAAVFAQAAYSLSYDTQQRSKRLEW-VDKK-A-EDSLSPDKRLEWVDKKTPEKRLFWVDKKTP-----EK  
Gl\_sp\_no MQSSNIAALATLFVFAAVFAQAAYSLSYDTQQRSKRLEW-VDKK-A-EDSLSPDKRLEWVDKKTPEKRLFWVDKKTP-----EK  
Am\_laud MQSSNIAVLATLFVFAAVFAQAAYSLSYDTQQRSKRLEW-VDKK-A-EDSLSPDKRLEWVDKKTPEKRLFWVDKKTP-----EK  
Op\_john MQSSNIAALATLFVFAAIFAQAAYSLSYDTQQRSKRLEW-VDKK-A-EDSLSPDKRLEWVDKKTPEKRLFWVDKKTP-----EK

Op\_filo RLFWVDKKDAKDECVPISNIDKVADCMISVVSQYAKHIEAECKSSGTLSESCVNDMNVKRTGANINCLYDTEGGNN--  
Am\_squa RLFWVDKKDGEMEL----DYNKIADCMLQVVEELSKHIESQCRVEGSLSQSCVTDMSNKRAAANKNCLIDPTGGSS--  
Op\_resi RLFWVDKKGADVFPVSLNIDKIADCMIQVVSQYGKHIEEQCKQDGTLSQSCVEEMNEKRTQANTNCLT--EEGH---  
Op\_savi RLFWVDKKGADVFPVSLHDIDKIADCMIQVVSQYGKHIEEQCKQDGTLSQSCVEEMNEKRTQANTNCLT--EGGQ---  
Op\_abys RLFWVDKKGADVFPVSLNDIDKISDCMIQVVSQYAKHIEETCKQDGSLSQSCVEGMNGKRTQANFNCLTNYEGGVGGE  
Op\_angu RLFWVDKKNADVVPVPSIDEIDKIADCIIQVVTQYGKHIEEQCKQEDSLSKSCVEEMNDKRTQANFNCLTNYA-----  
Op\_caes RLFWVDKKNADVVPVPSIDEIDKIADCIIQVVTQYGKHIEEQCKQEEESLSKSCVEEMNEKRTQANFNCLTNYT-----  
Op\_fasc RLFWVDKKDSDTECVPVTNIDKVADCMINVVSQYAKHIEAECKEPGVLEACVKQVNEKRTQANINCLYD TDGN----  
Op\_scha RLFWVDKKDSDTECVPVTNIDKVADCMINVVSQYAKHIEAECKEPGVLEACVKQVNEKRTQAN-----  
Op\_reti RLFWVDKKDADTECVPVTNIDKVADCMINVVSQYAKHIEAECKEPGVLEACVKQVNEKRTQANINCLYD TDGN----  
Op\_lame RLFWVDKKDSDKESVLI SNIDKIADCMIQVVSQYAKHIESDCKQTGTLSKSCVEKVNEERTQANINCLYETNEGN---  
Op\_bisp RLFWVDKKDADAECVPSNIDKVADCMINVVSQYAKHIEECKAPGTLS-ESCVKELNQRRTQANINCLYDAEGGN---  
Op\_vall RLFWVDKKDSDTQCVPSNIDKLADCMISVVSQYAKHIEETECKEPGTLS-ESCVKQVNEKRTANINCLYDTEGGN---  
Op\_brev RLFWVDKKDADAECVPTNIDKVADCMISVVSEYAKHIEETECKAPGTLS-ESCVKDVNAKRTQANINCLYD TDGSK---  
Ba\_hero RLFWVDKKDEDSVQVQVTHINKIADCMIKVSEYGKHIEAECKQPGVNT-ETCVEKLVNKRRAEAMNCLYDYEGGQP--  
Op\_appr RLFWVDKKDDAVQVQVTHINKIADCMIKVVAEYGKHIEAECKQQGVNT-ETCVEQLNVKRAEAMNCLYDYEGGQP--  
Op\_vivi RLFWVDKKDDAAQVQVISHINKIADCMIKVVAEYGKHIEAECKQPGVNT-ETCLVDMNVKRAESNMNCLYDFEGGHA--  
Op\_aust RLFWVDKKDDSAQVQVIAHINKIADCMIKVSEYGKHIEAECKQPGVST-ETCIEEMNVKRAESNMNCLYDFEGGQA--  
Op\_cyli RLFWVDKKDDSVLVQVKHINKIADCMIKVVAEYGKHVQAECKQPGVDA-QTCVEELSIKRAEAMNCMMSDIEGGQS--  
Op\_wend RLFWVDKKSDETIQVPI SHINKVADCMLKVTEYAKHVKAEECEQPGVNA-ESCVEQRNVERAEANINCLYDYEGGQP--  
Op\_plic RLFWVDKKDDETVTIELKYINKIADCMIKVSEYAKHIEAECKQPGVET-QTCVEQLNVKRTGANINCLYDFEGGAP--  
Op\_fune RLFWVDKKDDDTVTIEIKYINKIADCMIKVSEYAKHIEAECKQPGVET-QTCVEELNVKRTGANINCLYNFEGGAP--  
Op\_perf RLFWVDKKDDAVTIEIKYINKIADCMIKVSEYAKHIEAECKQPGVET-QTCVEQLNVKRTGANINCLYDFEGGAP--  
Cl\_cana RLFWVDKKDDESVPVHIKYINKVADCMIKVSEYAKHIEAECKEPGVET-QTCVEKLVNKRTEANINCLYDFEGGAP--  
Op\_exim\_1 RLFWVDKKADETASILIANINKIADCMIKVSEYAKHIEAECKQPGVET-QACVEQLNVKRTGANINCLYDYEGGHP--  
Op\_prol RLFWVDKKDSDTVPAAAGNINKVADCMIKVSEYAKHIEDECKEQGRIT-QDCVEQLNVKRAEAMNINCLYDSGGGNH--  
Gl\_sp\_no RLFWVDKKAADG----LSNINALADC FVKVFSKYLDHVSA-CKEAGLENVKECMEDVNQRRTIANTNCMHDTEGSSK--  
Am\_laud RLFWVDKK-ADG----FSKIDALADC MVKVF SKYMEHVSA-CKDEGIDKVKECMSEINAKRTIANTNCMYDTEGAE---  
Op\_john RLFWVDKK-ADAPNFPVSNINDIADCMIKVF AKYAEHVEA-CKNSGVEGLKECMEEVNQRRTISNTNCLSDTEGGM---

NP26

|           |                            |                                                                    |                                    |                                     |        |
|-----------|----------------------------|--------------------------------------------------------------------|------------------------------------|-------------------------------------|--------|
| Am_cipu   | MLGMKTLVAYAAIVLALIV-TTGTS  | EDIE----                                                           | DTEDLQIADE-NELTYI-----             | EPN-YQELLISLQKAREN--GA-LQDIDD-----  | KRMAS- |
| Mi_grac   | MLGMRSLLAYAAIVLALVV-SIGTSE | EDIE----                                                           | DTAE-ELLDE-NVITDVD----             | EPN-YQDLLLSLQKARRN--GL--QDVDD-----  | KRMAA- |
| Am_squa   | MLGMRSLLAYAAVVLAVIV-STGTSE | EDLE----                                                           | NTEE--FVDE-NALTDFE----             | QPDYQOELLRSRVQKAREN--DF--EDVDD----- | KRMAA- |
| Op_savi   | MLGMKTLAYAAIVLALVV-TTGTS   | EDIE--DPETEELQLADE-NEITDI-----                                     | EPD-YEALLASLQRAREI--GYDGDVDD-----  | KRMAS-                              |        |
| Op_abys   | MLGMKTLAYAAIVLALVV-TTGTS   | EDIE--DLDTEELQLGDE-NEITDI-----                                     | EPN-YQALLSSLQRAREN--GY--DDVDD----- | KRMAS-                              |        |
| Op_angu   | MLPLKSLLASVAIVLALIVTTTGT   | EDLE--DTDTQNIETPND-NDIMDI-----                                     | EPDFFEALLSNLQKAREN-LYE--DDIDA----- | KRMAS-                              |        |
| Op_caes   | MLPMRTLIASAAIVLTLIVTTTGT   | EDIE--DTETHNLEIPDD-NDIMDI-----                                     | EPD-FEALLSSLQKARDN-LYE--DDIDD----- | KRMAS-                              |        |
| Op_reti   | MLGMKTLAYAAIVLALVV-TTGTS   | EDIE--EPDTQELQLADE-NELMDI-----                                     | EPD-YPELLMNLQKAREN-GGL--QDVDD----- | KRMAS-                              |        |
| Op_lame   | MLGMKTLAYAAIVLALVV-TTGTS   | EDIE--EPETQELQLADE-NELMDI-----                                     | EPD-YQELLMNLQRAREN--GL--QEVDD----- | KRMAS-                              |        |
| Op_impr   | MLGMKTLAYAAVVFALVV-STGTSE  | EDIE--EPEIEELQLADE-NELMDI-----                                     | EPD-YQELLLNLQKAREN--GV--QDIED----- | KRMAS-                              |        |
| Op_bisp   | MLGMKTLAYAAIVLALVV-SIATSE  | EDIE--EPDSEELQLADE-NELMDI-----                                     | EPD-YQELLMNLQKAREN--GV--QDIDY----- | KRMAA-                              |        |
| Op_brev   | MLGVKTLVAYAAILLALIV-STGTSE | IDID--EPDTQQLQLLDE-NELMDI-----                                     | EPD-YEELLMNLQRAREN--G--KEFDE-----  | KRMSS-                              |        |
| Ba_hero   | MLGVKAVLAYAAIVLALVV-SIGTSE | DVI--DPETEDLELADQ-NELMDL-----                                      | ETD-YQELLLNLQRARAN-AGE--QELDE----- | KRMSS-                              |        |
| Op_cyli   | MLGVKTVLAYAAIVLALVV-STGTSE | DVT--EPETEELQLADE-NELMDL-----                                      | EPD-YQELLLNLQRARANAAGE--QEVDE----- | KRMSS-                              |        |
| Op_wend   | MLGMKTILAYAAIVLALVV-TTGTS  | DVI--EPETEELQLADE-NELMDL-----                                      | EPD-YQELLLNLQRAREQ-AGE--HELND----- | KRMAS-                              |        |
| Op_plic   | MLGVKTVLAYAAVVLALVV-STGTSE | DIT--EPEAELELANE-NELMDL-----                                       | EPE-YQELLMNLQRARSN-AGD--QEIDE----- | KRMSAS                              |        |
| Op_fune   | MLGVKTVLAYAAIVLALVV-STGTSE | DIT--EPEAELELANE-NELMDL-----                                       | EPD-YQELLLNLQRARSN-AGD--QEIDE----- | KRMSAS                              |        |
| Op_perf   | MLGVKTVLAYAAVVLALVV-STGTSE | DIT--EPEAELELANE-NELMDL-----                                       | EPD-YQELLMNLQRARSN-AGD--QEIDE----- | KRMSAS                              |        |
| Cl_cana   | MLGVKTVLAYAAVVLALVV-STGTSE | DIT--EPEAELELANE-NELMDL-----                                       | EPD-YQELLMNLQRARSN-AAE--QELDE----- | KRMAAS                              |        |
| Op_exim_1 | MLGVKTVLAYAAVVLALVV-STGTSE | DIT--EPESEEFELANE-NELMDL-----                                      | EPD-YQELLMNLQRARSN-AGD--QELDE----- | KRMSAS                              |        |
| Op_exim_2 | MLGVKTVLAYAAVVLALVV-STGTSE | DIT--EPESEEFELANE-NELMDL-----                                      | EPD-YQELLMNLQRARSN-AGD--QELDE----- | KRMSAS                              |        |
| Op_liod   | MLGMKTVLAYGAIVLALVV-STGTSE | DIV--EPESEEFELANQ-NEFMDL-----                                      | EPD-VQELLMNLQRARAS--GE--QEIDD----- | KRMTSA                              |        |
| Op_prol   | MLGMKTVLAYAAIVLALVV-STGTSE | DIV--EPESEEFELANE-NELMDL-----                                      | EPD-YQELLMNLQRARAN--GE--LEVDD----- | KRMAS-                              |        |
| As_tubi   | MLGVKTVLAYFAIVLALVV-TAGTSE | DVD--ESDTEKYDQSDN-NNVIDDFDKSEPD-YQELLMNLQARAI--EL--EADD-----       | KRARGA                             |                                     |        |
| Op_oedi   | MLGVKTVLAYSIVLALVV-TAGTSE  | DVD--ESDTEKYDQSDN-NNVIDDFDKSEPD-YQELLMNLQARAT--EL--EEADD-----      | KRARGA                             |                                     |        |
| As_love   | MLRVKTVLAYSIVLALVV-SAGTSE  | DVE--ESDAEKYDQVDD-NNFIDDFDKSEPD-YQELLMNLQARAK--QL--EFDDMSSRWKKAQEA |                                    |                                     |        |
| Gl_sp_no  | MLGVKSMLAYAAIVLALVV-STGTSE | DI---EPETDEYGLADSDDDVIDF--KDIEPD-YQELLMNLQRARAN--SA--QDFNN-----    | KRMAS-                             |                                     |        |
| Op_john   | MLGVKTVLAYAAIVLALVV-STGTSE | DVRIEPEAEDEFELADD-NDLIDF--KDIEPE---ELLMNLQRARAI--GQ--QELDE-----    | KRMSS-                             |                                     |        |

|           |                           |              |             |     |               |     |               |           |  |  |  |  |  |  |  |  |  |  |  |  |        |         |        |
|-----------|---------------------------|--------------|-------------|-----|---------------|-----|---------------|-----------|--|--|--|--|--|--|--|--|--|--|--|--|--------|---------|--------|
| Am_cipu   | -GWKRSKM-AAGWKR           | GQNAAGWKR    |             |     |               |     |               |           |  |  |  |  |  |  |  |  |  |  |  |  | GSN--- | AAAGWKR | -GQALP |
| Mi_grac   | -GWKRADM-AAGWKR           | GQSAAAGWKR   | GQSAAAGWKR  |     |               |     |               |           |  |  |  |  |  |  |  |  |  |  |  |  | PAN--- | AAAGWKR | -G-AMA |
| Am_squa   | -GWKRGNSAAAGWKR           | GNSAAAGWKR   | GQTAAAGWKR  |     |               |     |               |           |  |  |  |  |  |  |  |  |  |  |  |  | PANA-- | AAAGWKR | GGTSMA |
| Op_savi   | -GWKRGQSAAAGWKR           | GQSAAAGWKR   |             |     |               |     |               |           |  |  |  |  |  |  |  |  |  |  |  |  | GHA--- | AAPGWKR | -GHAAA |
| Op_abys   | -GWKRGQSAAAGWKR           | GQSAAAGWKR   |             |     |               |     |               |           |  |  |  |  |  |  |  |  |  |  |  |  | PANPAN | AAAGWKR | -GQAAA |
| Op_angu   | -GWKRGHSAVSGWKRDQP        | --QPR        | -QMAASGWKR  |     |               |     |               |           |  |  |  |  |  |  |  |  |  |  |  |  | GNA--- | AASGWKR | -GQAAA |
| Op_caes   | -GWKRGHSAAGWKRDQS         | --QPR        | -GQMAASGWKR | DQS | QPRGQSAASGWKR | DQS | QPRGQSAASGWKR | PANAAGWKR |  |  |  |  |  |  |  |  |  |  |  |  | GHA--- | AASGWKR | -GQAAV |
| Op_reti   | -GWKRGQSAAAGWKR           | GQSAAAGWKR   |             |     |               |     |               |           |  |  |  |  |  |  |  |  |  |  |  |  | PA---  | SAAGWKR | -GQAAA |
| Op_lame   | -GWKRGQSAAAGWKR           | GQSAAAGWKR   |             |     |               |     |               |           |  |  |  |  |  |  |  |  |  |  |  |  | PA---  | SAAGWKR | -GQAAA |
| Op_impr   | -GWKRGPSAAAGWKR           | GQSAAAGWKR   |             |     |               |     |               |           |  |  |  |  |  |  |  |  |  |  |  |  | PAS--- | AAAGWKR | -GQSAA |
| Op_bisp   | -GWKRGQSAAAGWKR           | GQSAAAGWKR   |             |     |               |     |               |           |  |  |  |  |  |  |  |  |  |  |  |  | PAS--- | AAAGWKR | -GQSAA |
| Op_brev   | -GWKRAQS-AAGWKRAQSA       | -AGWKR       | APSAAAGWKR  |     |               |     |               |           |  |  |  |  |  |  |  |  |  |  |  |  | PAS--- | AASGWKR | -APSAA |
| Ba_hero   | -GWKRAQG-AAGWKRTQSAAAGWKR |              |             |     |               |     |               |           |  |  |  |  |  |  |  |  |  |  |  |  | PAS--- | AAAGWKR | -GQSAA |
| Op_cyli   | -GWKRAQS-AAGWKRTQSAAAGWKR |              |             |     |               |     |               |           |  |  |  |  |  |  |  |  |  |  |  |  | PAS--- | AAAGWKR | -GQSAA |
| Op_wend   | -GWKRAQG-AAGWKRTQNAAAGWKR |              |             |     |               |     |               |           |  |  |  |  |  |  |  |  |  |  |  |  | PAS--- | AAAGWKR | -GQSAA |
| Op_plic   | -GWKRAQ--AAGWKRAQSAA-GWKR |              |             |     |               |     |               |           |  |  |  |  |  |  |  |  |  |  |  |  | PAS--- | AAAGWKR | -GQPAA |
| Op_fune   | -GWKRAQ--AAGWKRAQSAA-GWKR |              |             |     |               |     |               |           |  |  |  |  |  |  |  |  |  |  |  |  | PAS--- | AAAGWKR | -GQAAA |
| Op_perf   | AGWKRAQG-AAGWKRAQSAA-GWKR |              |             |     |               |     |               |           |  |  |  |  |  |  |  |  |  |  |  |  | PAS--- | AAAGWKR | NGQSAA |
| Cl_cana   | -GWKRAQG-AAGWKR           | MQSAA-GWKR   |             |     |               |     |               |           |  |  |  |  |  |  |  |  |  |  |  |  | PAS--- | AAAGWKR | -GQAAA |
| Op_exim_1 | -GWKRAQG-AAGWKRTQSAA-GWKR |              |             |     |               |     |               |           |  |  |  |  |  |  |  |  |  |  |  |  | PAS--- | AAAGWKR | -GQAAA |
| Op_exim_2 | -GWKRAQG-AAGWKRTQSAA-GWKR |              |             |     |               |     |               |           |  |  |  |  |  |  |  |  |  |  |  |  | PAS--- | AAAGWKR | -GQAAA |
| Op_liod   | -GWKRAQG-AAGWKRAQGAA-GWKR |              |             |     |               |     |               |           |  |  |  |  |  |  |  |  |  |  |  |  | PAS--- | AAAGWKR | -GQSAA |
| Op_prol   | -GWKRAQG-AAGWKRGQSAA-GWKR |              |             |     |               |     |               |           |  |  |  |  |  |  |  |  |  |  |  |  | PAS--- | AAAGWKR | -GQSAA |
| As_tubi   | AGWKR                     | GQT-AAGWKRP  | PHAAAGWKR   |     |               |     |               |           |  |  |  |  |  |  |  |  |  |  |  |  | GQT--- | AAAGWKR | -RQTAA |
| Op_oedi   | AGWKR                     | GQT-AAGWKRP  | PHAAAGWKR   |     |               |     |               |           |  |  |  |  |  |  |  |  |  |  |  |  | GQT--- | AAAGWKR | -RQTAA |
| As_love   | AGWKR                     | QAQA-AAGWKRP | PSAAAGWKR   |     |               |     |               |           |  |  |  |  |  |  |  |  |  |  |  |  | GQS--- | AAAGWKR | -EQSAA |
| Gl_sp_no  | -GWKRAQG-AAGWKRAQGAA-GWKR |              |             |     |               |     |               |           |  |  |  |  |  |  |  |  |  |  |  |  | SQ---  | GASGWKR | -AQG-A |
| Op_john   | -GWKRAQG-AAGWKRGQSAA-GWKR |              |             |     |               |     |               |           |  |  |  |  |  |  |  |  |  |  |  |  | APN--- | AAAGWKR | -GQS-A |

|           |       |        |          |       |          |           |     |           |         |          |           |            |             |
|-----------|-------|--------|----------|-------|----------|-----------|-----|-----------|---------|----------|-----------|------------|-------------|
| Am_cipu   | GGWKR | GQSAAA | SGWKR    | GHA   | -AAGWKR  | -----     | DFE | VPIDVD    | TRGGET  | TWRNNQVK | -TASGWKR  | TSRSANLLQQ | --NDEDEP    |
| Mi_grac   | GGWKR | GQAAAA | -GWKR    | GPA   | AAAGWKR  | -----     | DFE | --PIEVD   | TRGDGN  | WRDNQIK  | -TASGWKR  | TSRSVNNVQE | -NAEEEEEP   |
| Am_squa   | GGWKR | GQAAAA | -GWKR    | GNSAA | AGWKR    | -----     | DFE | --PIEVD   | TRDNGN  | YRNNQIK  | -AASGWKR  | TSRSVNLVQD | -NTEEEEEP   |
| Op_savi   | PGWKR | GHAAP  | -GWKR    | GQYAA | AGWKR    | -AQAAGWKR | RDY | --PIEVD   | TRAGEN  | WRNSQMK  | -AASGWKR  | T-----     | -----LH     |
| Op_abys   | AGWKR | GQAAAA | -GWKR    | GQSAA | AGWKR    | AAQAAGWKR | RDY | --PIDVET  | RG-ENRR | DPQMK    | -AASGWKR  | T-----     | -----LH     |
| Op_angu   | SGWKR | GQAAA  | -SGWKR   | GQAAA | SGWKR    | -----     | D   | ----PIEVD | TRGNNN  | WRNSQVK  | -SASGWKR  | TVY        | -----       |
| Op_caes   | SGWKR | GQAAA  | -SGWKR   | ----- | -----    | -----     | D   | ----PIEVD | ARGDNN  | WRNSQIK  | -SASGWKR  | TPY        | -----       |
| Op_reti   | AGWKR | GQSAAA | -GWKR    | GQSAA | AGWKR    | -----     | DYN | --PIEVD   | TRGGEN  | WRKANM   | NAAASGWKR | TARSANRQQ  | ---NANQLP   |
| Op_lame   | AGWKR | GQSAAA | -GWKR    | ----- | -----    | -----     | DYN | --PIEVD   | TRGGEN  | WRNANM   | KAASGWKR  | TARSASRQQ  | NVENANQLP   |
| Op_impr   | AGWKR | GQSAAA | -GWKR    | AK    | --PAGWKR | -----     | DY  | ---PIEVD  | TRGGEN  | WRNGNM   | KSASSGWKR | TARSATRQQ  | NVENANQLP   |
| Op_bisp   | AGWKR | GQSAAA | -GWKR    | AK    | --AAGWKR | -----     | DY  | ---PIEVD  | TRAGEN  | WRNGNV   | KSASSGWKR | TARSATRQQ  | YVENANQLP   |
| Op_brev   | AGWKR | AQGAA  | --GWKR   | ----- | -----    | -----     | DY  | ---PIDID  | TRGDEN  | WKANM    | KNAASGWKR | TSRSASR    | --NVDNIDQLP |
| Ba_hero   | AGWKR | AKG    | --ASGWKR | ----- | -----    | -----     | DN  | ---PIDVD  | TRGGEN  | WRNSNL   | KTASSGWKR | TARSANRQQ  | RVENTNQLP   |
| Op_cyli   | AGWKR | AKG    | --ASGWKR | ----- | -----    | -----     | DN  | ---PIDVD  | TRGGEN  | WRNTNL   | KTASSGWKR | TARSANRQQ  | RVD---QLP   |
| Op_wend   | AGWKR | AQSAA  | --GWKR   | ----- | -----    | -----     | DN  | ---PIDVD  | TRGGDN  | WRNNNL   | K-SASGWKR | TARSATRQQ  | RVDNSNQLP   |
| Op_plic   | AGWKR | AKG    | --ASGWKR | ----- | -----    | -----     | DN  | ---PIDVD  | TRGGEN  | WRH-NE   | KTASAGWKR | TARSATRQQ  | RVDNTYQFP   |
| Op_fune   | AGWKR | AKSAA  | --GWKR   | ----- | -----    | -----     | DN  | ---PIDLD  | TRGGEN  | WRHND    | KTASSGWKR | TARSATRQQ  | RADNTYQLP   |
| Op_perf   | AGWKR | AKG    | --ASGWKR | ----- | -----    | -----     | DN  | ---PIDVD  | TRGGEN  | WRH-NE   | KTASSGWKR | TARSAPRQQ  | RVDNTYQLP   |
| Cl_cana   | AGWKR | AKG    | --ASGWKR | ----- | -----    | -----     | DN  | ---PIDVD  | TRGGEN  | WRNSNE   | KTASSGWKR | TARSATRQQ  | RVDNTYQLP   |
| Op_exim_1 | AGWKR | AKG    | --ASGWKR | ----- | -----    | -----     | DN  | ---PIDVD  | TRGGEN  | WRNTNE   | KTASSGWK  | -----      | -----       |
| Op_exim_2 | AGWKR | AKG    | --ASGWKR | ----- | -----    | -----     | DN  | ---PIDVD  | TRGGEN  | WRNTNE   | KTASSGWKR | TARSATRQQ  | RADNTYQLP   |
| Op_liod   | AGWKR | AKG    | --ASGWKR | ----- | -----    | -----     | DN  | ---PIDME  | TRGGEN  | WKPNL    | KTASAGWKR | TARSANIQQ  | RVDNTNQLP   |
| Op_prol   | AGWKR | AKG    | --ASGWKR | ----- | -----    | -----     | DN  | ---PIDLD  | TRGGEN  | WRNPNL   | KTASSGWKR | TPRSASRQQ  | RVDNTNQLP   |
| As_tubi   | AGWKR | AKGAA  | --GWKR   | ----- | -----    | -----     | DN  | ---QIDLD  | TRGGNS  | WRNSNL   | K-AAAGWKR | TSRSANRQQ  | EEDTIDQIP   |
| Op_oedi   | AGWKR | AKGAA  | --GWKR   | ----- | -----    | -----     | DN  | ---QIDLN  | TRGGNS  | WRNSNL   | K-AASGWKR | TSRSANRQQ  | EEDTIDQIP   |
| As_love   | AGWKR | AKG    | --ASGWKR | ----- | -----    | -----     | DN  | ---PIDLN  | TRGGEN  | WRNSNS   | KSASAGWKR | TTRSANRQQ  | IENINQLP    |
| Gl_sp_no  | AGWKR | AKS    | --ASGWKR | ----- | -----    | -----     | DN  | ---PISME  | TRGDEN  | WRHNNI   | KSASSGWKR | TSRSANKE   | QRIEDVNQLP  |
| Op_john   | AGWKR | GKS    | --ASGWKR | ----- | -----    | -----     | DS  | ---PISLE  | TRSGEN  | WRNANL   | KTASSGWKR | TARSANRQQ  | TV--VNQHP   |

NP27

Am\_cipu MRMITC-TALLCVLLAL-LDTRQAVC--EAG-IPVRYQTGTFFGKRT-VTDEDALRALDGPYGRNLLDLLKAWVYRYSQMEAAEQVDAK  
Am\_cons\_1 MRMITC-TALLCVLLAL-LDTRQAVC--EGG-IPVRYQTGTFFGKRT-VTDEDALRALDGPYGRNLLDLLKAWVYRYNQMEAAEQVDSK  
Op\_filo MRLVTCATALLCVLFAL-LDTRQAVC--EAG-IPVRYQTGTFFGKRT-VSDEDVLRALDGPYGRNLLDL-----  
Mi\_grac MRLITCATALICVLLAL-LDTRQAVC--EAG-IPVRYQTGTFFGKRT-VSDEDVLRALDGPYGRNLMDLLKTWVYRYSQMEAADQLETN  
Am\_squa MRLIACCTALICVLLAL-LDTRQAVC--EGG-IPVRYQTGTFFGKRT-VSDADVLRALNGPYGRNWMDLLKEA-YRYSQLEAADQLEGN  
Op\_resi MRMITC-AALLCVLLAL-LDTRQNGC--EAG-IPVRYQTGTFFGKRT-QVTSDEDVLRALAGPSNRNLLNLMKAW-YQLNQLOGVDQVESN  
Op\_savi MRMITC-AALFCVLLAL-LDTRQNGC--EAG-IPVRYQTGTFFGKRT-QVTSDEDVLRALAGPSDRNLLNLMKAW-YQLNQLOGVDQVESN  
Op\_abys MRMITC-AALFCVLLALILDTRQNGC--EAG-IPVRYQTGTFFGKRT-NVISDEDVLRALDGPYGRKLLDLMKAW-YQLNQLEAVEQVESN  
Op\_angu MRMITC-AAVLCLLLALILDTRQNGC--EAN-IPVRYQTGTFFGKRT-KAATDEEIMRSLEGAHGRNVLDLVKRW-YQLNQLOGVEQVDSN  
Op\_scha -----LAL-IDTRQNGC--EAG-IPVRYQTGTFFGKRT-VSDEDVLRALDGPYGRNLLDLMKAWVYRLHQMEAAEQVESN  
Op\_reti MRMITC-AALLCVLLAL-IDTRQNGC--EAG-IPVRYQTGTFFGKRT-VSDEDVLRALDGPYGRNLLDLMKAWVYRLHQMEATEQVESN  
Op\_impr MRMITC-TALLCVLLAL-LDTRQSGC--EAG-IPVRYQTGTFFGKRT-ISDEDVLRALDGPYGRNLLDLMKARVYR--QMEAAEEVESN  
Op\_bisp MRMITC-AALLCVLLAL-LDTRQSGC--EAG-IPVRYQTGTFFGKRT-VSDEDVLRALDGPYGRNLLDLMKAWVYRLNQMEVAEQVESN  
Op\_vall MRMITC-AALVCVLLAL-LDTRQNGC--EAG-IPVRYQTGTFFGKRT-VSDEDVLRALDGPYGRNLLDLMKAWVYRLNQMETADQIEAN  
Op\_brev MRVITC-AALLCMLLAL-LDTRQSGC--EAG-IPVRYQTGTFFGKRT-VSDDVLRALDGPYGRNLLDLMKAWVYRLNQLEVGEQVEAN  
Ba\_hero MRMLTC-AALLCILLAL-LDTRQSGC--EAG-IPVRYQTGTFFGKRT-MSDEDVLRALDGPYGRNLLDLMKAWVYRLKQMEAAEEVESN  
Op\_wend MRMLTC-AALLCVLLAL-LDTRQSGCVAAG-IPVRYQTGTFFGKRT-MSDEDVLRALDGPYGRNLLDLMKAWVYRLKQMEAVDEVEAH  
Op\_fune MRVITC-AALFCVLLAL-LDTRQNGC--EAG-IPVRYQTGTFFGKRT-TSDEDVLRALDGPYGRNLLDLMKAWLYRLNQIEAAQEVESN  
Op\_perf MRMITC-AALFCVLLAL-LDTRQNGC--EAG-IPVRYQTGTFFGKRT-TSDEDVLRALDGPYGRNLLDLMKAWLYRLNQMEAAQEVESN  
Cl\_cana MRMITC-AALFCVLLAL-LDTRQNGC--EAG-IPVRYQTGTFFGKRT-TTDEDVLRALDGPYGRNLLDLMKAWLYRLNQMEAAQEVESN  
Op\_liod MRMITC-AALLCVLLALILDTRQSGC--EAG-IPVRYQTGTFFGKRT-MSDEDILRALNGPYGRNMMDRMKSVMYR--QMEAAEEVESN  
Op\_prol MRMITC-AALLCVLLAL-LDTRQNGC--EAG-IPVRYQTGTFFGKRT-MSDEDVLRALDGPYGRNLLDLMKAWVYRLNQMEAAEEVESN  
As\_tubi MRMLIF-AALLCVLLAL-LDTRQNGC--EAG-IPVRYQTGTFFGKRT-ILTDEDVLRALDGPYGRNLMDLKMSWLYRLNQIKVAKEVESN  
As\_bidw MRMLIF-AALLCVLLAL-LDTRQNGC--EAG-IPVRYQTGTFFGKRT-ILTDEDVLRALDGPYGRNLMDLKMSWLYRLNQIKVANEVESN  
As\_love MRMITC-ATLLCVLLAM-LDTRQNGC--EAG-IPVRYQTGTFFGKRT-MTDEDVLRALDGPYGRNLMDLKMSWLYRLNQVQVTKEVESN  
Gl\_sp\_no MRVITC-TVLMCVLLAL-IDTRQSYC--EAGRIIPVRYQTGQIFGKRT-MSDEDVLRALDGPYGRNLLDLMKLSVYRLNQLEGTDEVESK  
Op\_john MRVITC-ATLLCVLLAL-IDTRQSGC--EAGRIIPVRYQTGQIFGKRT-MTDEDVLRALDGPYGRNLLDLMKLSAYRLNQLEGADDVESN  
Op\_lyma MRVITC-AALLCVLLAL-IDTRQSGC--EAGRIIPVRYQTGQIFGKRT-MTDDVLRALDGPYGRNLLDLMK-----

PDF

Am\_cipu MHATLLFSSAIVVLLGLAASSSDDLDPKRIADNDF AQMRSQADRD FEVVAFKNLLKEYLRTYGKRD--VEKRLSQNDFSQLRSNQLDEELTKQLIARFLHQAGRR  
Am\_cons\_1 MHATLLFSSAILVLLGLVA-SDDLDPKRIADNDF AQMRSQADRD FEVVAFKNLLKEYLRTYGKRD--VEKRLSQNDFSQLRSNQLDEELTKQLIAKFLHQAGRR  
Mi\_grac MHATLLFSSAILVLLGLAASSSDDLDPKRIADNDF AQMRSQADRD FEVVAFKNLLKEYLSKYGKRN--VEKRLSQNDFSQLRSNLLDEELTKQLIAKFLEQAGRR  
Am\_squa MHATLLFSSAILVLLGLAASSSDNLPDKRIADNDF AQMRSQADRD FEVVAFKNLLKEYLRTYGKRD--VEKRLSQNDFSQLRSNQLDEELTKQLIAKFLQOAGRR  
Op\_savi MHTTLIFSSAVLAVLLGVVI-STDSLDPKRIADNDF AQMRSQADRD FEVIAFKNLLREYLSNYGKRN--VEKRLSQNDF AQQRSNQMEEDIMKQMI AQILKNAGRR  
Op\_abys MHTTLIFSSAILAVLLGLVA-SSDSLDPKRIADNDF AQMRSQADRD FEVIAFKNLLREYLGKYGKRD--VEKRLSQNDFAEQRSNQ IDEEIMKQMI AQFLNRAGRR  
Op\_caes MHTTLMFSSAIAVLLALTV-STESLDPKRIADNDF AQMRSQADRD FEVIAFKNLLREYLGKHGKRN--VEKRLSQNDFAEQRSNQND EIMKQMI AQFLQKTGRR  
Op\_scha MHTTLIFSSAILAVLLGLAA-SSDSLDPKRIADNDF AQMRSQADRD FEVIAFKNLLREYLGROGKRD--VEKRLSQNDFSQMRSNLLDEELTKQLIAKFLYQAGRR  
Op\_reti MHTTLIFSSAILAVLLGLAA-SSDSLDPKRIADNDF AQMRSQADRD FEVIAFKNLLREYLGROGKR --VEKRLSQNDFSQIRSNLLDEELTKQLIAKFLYQAGRR  
Op\_impr MHTTLIFSSAILAVLLGLAA-SSDSLDPKRIADNDF AQMRSQADRD FEVIAFKNLLREYLGROGKRD--VEKRLSQNDFSQLRSNLLDEELTKQLIAKFLYQAGRR  
Op\_brev MHTSLIFSSAILAVLLCLVAS-TSDLLDPKRIADNDF AQMRSQADRAHENILFKNLLKQILFEQGKRD--VDKRLSQNDFSQLRSNLLDEELTKQLIAKFLYQAGRR  
Ba\_hero MHTTLIFSSAILAVLLCLAASSSDLLTEKRIADNDF AQMRSAADRANEDIKFRNLLKQILFEQGKRD--VDKRLSQNDFSQLRSNLLDEELTKQLIAKFLFQAGRR  
Op\_wend MHTTLIFSSAILAVLLGLAASSSDLLTEKRIADNDF AQMRSAADRANEDIKFRNLLKQILFEQGKRD--VDKRLSQNDFSQLRSNMLDEELTKQLIAKFLFQAGRR  
Op\_fune MHTTIVFLSAILAVLLGLAT-STDLLPEKRIADNDF AQMRSAADRANEIAFRNLLKQILFEQGKRDV-VDKRLSQNDFSQLRSNQLDEELTRQLIAKFLFQAGRR  
Op\_perf MHTTIVFLSAILAVLLGLAA-SSDLIPEKRIADNDF AQMRSAADRANEIAFRNLLKQILFEQGKRD--VDKRLSQNDYSQLRSNQLDEELTKQLIAKFLFQAGRR  
Cl\_cana MHTTLIFSSAILAVLLGLAA-SSDLLPEKRIADNDF AQMRSAADRANEIAFRNLLKQILFEQGKRD--VDKRLSQNDFSQLRSNQLDEELTKQLIAKFLFQAGRR  
As\_tubi MHTSLILSSAILAVLLSLAA-SDDLDPKRIADNDF AQMRSEADRANEVIAFRNLLQQILKEQGKRSY-IDKRLAQNDFSQLRNNQLDEELTKQLIAKFLSQAGRR  
As\_bidw MHTSLILSSAILAVLLSLVA-SDDLDPKRIADNDF AQMRSEADRANEVIAFRNLLQQILKEQGKRSY-IDKRLAQNDFSQLRNNQLDEELTKQLIAKFLSQAGRR  
As\_love MHTSLIFSSAILAVLLSLVA-SDDLDPKRIADNDF AQMRSEADRANEVIAFRNLLQQILKEQGKRSY-IEKRLAQNDFSQIRNNQLDEELTKQLIAKFLNQAGRR  
Op\_john MHITLIFSSAILAVLLCLTA-SDDLLEEKRIADNDF AQMRSIADRKNEAIAFRNLLSQILKEQGKRD--VEKRLSQNDFSQLRSNLLDEELTKQLIARFLYRAGRR

F-type SALMfa

Am\_cipu MARVRNVLLFATL-CCYASISS-GD-ENQ-V-GDNEEIDH-EQLVHLV-KRVANQVQFLEDQ-LGM---SD-----NNEEL-VKSLSKRQASN-QPA-NGLPMNVPVKMSGFAFCRDKRD-G

Am\_cten MARVRNVLLFATL-CCYASISS-GD-ENQ-V-GDNEEIDH-QQLVHFV-KRVANQVQFLEDQ-LGM---SD-----NNEEL-VKSLSKRQASN-QPA-NGLPMNVPVKMSGFAFCRDKRD-G

Am\_cons\_1 MARVRNVLLFATL-CCYASISS-GD-ENQ-V-REKEEIDH-DQLVDFV-RNLAEQVELLEDHVLMS---SE-----NNEGL-VKSLSKRQASN-RPA-SGLPMNVPVKMSGFAFCRDKRDGG

Am\_cons\_2 MARVRNVLLFATL-CCYASISS-GD-ENQ-V-REKEEIDH-DQLVDFV-RNLAEQVELLEDHVLMS---SE-----NNEGL-VKSLSKRQASN-RPA-SGLPMNVPVKMSGFAFCRDKRDGG

Op\_filo MARVRNVLLFATL-CCYASISS-GD-GNN-F-DDNQENNQ-DEFIDLA-RRIEREVQLLNKQ-LGI---TE---Y-NEDENL-VKSLSKRQANK-GSG-SGLPMNVPVKMSGFIFCRDKRD-A

Mi\_grac MARVRNVLLFATL-CCYASISS-GD-GND-L-DGNQNNQ-EKVLEHA-RRIEREVQLLNKE-LGF---TD---Y-NEDEDL-VKSLIKRQANK-GSG-NGLPMNVPVKMSGFISWCRDKRD-A

Am\_squa MARVRNVLLFATL-CCYASISS-GD-GNN-L-DEQQ--NQ-KEVLDLAIERIEREVHLLQEE---I---SE---Y-KQDEDLSVKSLHKRQANK-GSGNSGLPMNVPVKMSGFAFCRDKRD-A

Op\_resi MARVRHVLLFATL-CCYASISY-AN-ENE-Y-EPSQQLDH-EKLEDLA-SRIGEELRILELE-LGM---QD-----SNDVDM-VKSLQKRQAAT-RSGGSGGLPMNVPVKMSGFAFCRDKRD-G

Op\_savi MAMVRHVLLFATL-CCYASISY-AD-EENE-Y-EPSQQLDH-EKLVALA-SRIAEVRILELG-LGM---QD-----SNDVDI-VKSLQKRQAAT-RSGGSGGLPMNVPVKMSGFAFCRDKRD-G

Op\_abys MARVRHVLLFATL-CCYASISY-AD-ENE-Y-EPSQELDHEEKLVALA-SRIIDEVR--NFE-LGL---KD-----NDADM-VKSLQKRQATT-RS--SGLP--VPVKMSGFAFCRDKRD-G

Op\_angu MARVRHVLLFATL-CCYASISY-AE-ENE-Y-QTNQELH-DKLVELA-SRIAEVRILELE-LGI---QYNEDDTEDNTDI-IKSLQKRQAATPRSGGSGGLPMNVPVKMSGFAFCRDKRD-G

Op\_scha MARVRNVLLFATL-CCYASISYAVD-EEE-Y-EGTPELNN-EQLVQLV-KGIADVEVRILELE-LGV---QQ-----KDNDM-VKSLQKRQAVN-NPA-NGLPMNVPVKMSGFVFCRDKRDAS

Op\_reti MARVRNVLLFATL-CCYASISYGVDE-EDE-Y-QGTQD-NT-EQLKQLV-EGIGDEVRIELV-LGG---HP-----NKVNM-VRSLSKRQAVN-NPA-NGLPMNVPVKMSGFVFCRDKRDS

Op\_lame MARVRNVLLFATL-CCYASISHAD-EDE-Y-EGTQDLNH-EQLVQFA-RDMEHGLWRLEQE-LGM---QR-----DE-DM-VKSLQKRQAV--NPA-NGLPMNVPVKMSGFAFCRDKRDS

Op\_impr -----LLFATL-CCYASISY-AD-ENE-F-GATEDIDH-EQLVQLA-RKIAAEVRILELE-LGM---QE-----NDVDI-VKSLQKRQAVN-RPA-NGLPMNVPVKMSGFAFCRDKRD-G

Op\_bisp MARMRNIVLLFATL-FCYTSISY-AN-EDE-Y-GGNQDLDH-EQLVELA-RRIATEVRILELE-LGM---QE-----NDVDI-VKSLQKRQAVN-RPANGLPMNVPVKMSGFAFCRDKRD-G

Op\_vall MARARNLVLLFATI-CCYASISY-AD-EQE-Y-EGTQDLDH-EQLVELA-RRITEVRILEMELEDI---QD-----NHVPS-VKSLQKRQAVN-----GLPMNVPVKMSGFAFCRDKRDS

Op\_brev MARVRNVLLLATI-CCYASISY-AD-EQE-Y-EGSPDIDH-EQLVELA-SRIAEVRILELE-LSR---QD-----NDADI-VKSLQKRQA-----GGLPMNVPVKMSGFAFCRDKRDGG

Ba\_hero MARVRNVLLFVTL-CCYTSISH-AN-EP-----DVDQ-ENLVELA-RQIGEEVRILKVG-LGI---HD-----NNDV---VKSLQKRQAVN-HPA-SGLPMNVPVKMSGFAFCRDKRD-S

Op\_appr MARVRNVLLFVTL-CCYTSISQ-AN-EP-----DVDQ-ENLLDLA-RKIEEVRILERE-LN-----ENDVDN-VKSLQKRQAVN-NPA-SGLPMNVPVKMSGFAFCRDKRD-S

Op\_macu MARVRNVLLFVTL-CCYTSISH-AN-EP-----DVDQ-EDLAEAL-KKIEDEVRLLEIG-LGI---RD-----NNDVDI-VKSLQKRQAAN--PA-SGLPMNVPVKMSGFAFCRDKRD-S

Op\_vivi MARLRNVLLFATL-CCYTSISH-AD-EPN-Y-VVNPVDQ-ENLVELA-RQIGEEVRILEVG-LGI---RD-----NDDVDI-VKSLQKRQAGN-NPA-SGLPMNVPVKMSGFAFCRDKRD-S

Op\_cyli MDRVRNILLFVSL-CCYTSISH-AN-EPN-Y-GVAENADQ-ENLVELA-RKIGEEVRILELE-LGI---HG-----NDDVDI-VKSLQKRQAVN--PA-SGLPMNVPVKMSGFAFCRDKRD-S

Op\_wend MARVRNVLLCVTA-CCYASLCH-AN-ESK-Y-GESPDLDQ-ENLVELA-KKIGEVRLLELG-LRM---PA-----DDDVDI-VKSLQKRQAKD--PE-SGLPMNVPVKMSGFAFCRDKRD-T

Op\_plic MAGVRNLLVLFVTL-CCYASISH-AN-EPK-Y-EGTQDLQ-ENLVEFA-RKIGDELRIELG-LGIQ---NN-----DDNEDI-VKSLQKRQAGN-NPA-GGLPMNVPVKMSGFVFCRDKRD-A

Op\_fune MAGVRNLLLFVTL-CCYASISH-AN-ESK-Y-EGTQDLQ-ENLVEFA-RKIGDELRIELR-LG---N-----DDNEDI-VKSLQKRQA-N-NPA-SGLPMNVPVKMSGFVFCRDKRD-A

Op\_perf MARVRNLLLFATL-CCYTSISH-AN-EPK-Y-EATPDLQ-ENLVELA-RQIGDKLRLLOFG-LGI---EN-----NDE---VKSLSKRQAGS-NPG-SGVPNVPVKMSGFAFCRDKRD-A

Cl\_cana MAGVRNLLLFVATL-CFYASISH-AN-EPK-Y-EGTQDIDQ-ENLVELV-RKFGHDLRIEEG-LGI---KN-----IDDEGS-VKSLQKRQAGN-NPA-SGLPMNVPVKMSGFAFCRDKRD-A

Op\_exim\_1 MAGVRNLLLFATL-CCYASISH-AN-EPK-Y-GGNPDMQ-DNLVELA-RKIGDWRLLLELG-LGIQHVQN-----IDDEDI-VKSLQKRQAGN-NPA-SGLPMNVPVKMSGFVFCRDKRD-A

Op\_exim\_2 MAGVRNLLLFATL-CCYASISH-AN-EPK-Y-GGNPDMQ-DNLVELA-RKIGDWRLLLELG-LGIQHVQN-----IDDEDI-VKSLQKRQAGN-NPA-SGLPMNVPVKMSGFVFCRDKRD-A

Op\_liod MARVRNVLLFATL-CCYTSISH-AN-EQG-Y---EEEINK-ENLEDFA-RKLAAEVRILQLG-LGM---E-----DNEENI-VKSLQKRQADT-RPG-SALPMNVPVKMSGFAFCRDKRD-A

Op\_prol MARVRNVLLFATL-CCYTLISH-AH-AEG-YEATPEEVSK-ENLIEFA-RKIAAEVRILKLG-LGM-----DNDVDI-VKSLQKRQADD-HIG-SGLPMNVPVKMSGFAFCRDKRD-A

As\_tubi MAQMRNVLLFVTL-FCYASTSN-AD-DNN-FAANEEELNH-EQLVELA-RRISDEVRIELE-LGF---QD-KN---DDELET-VKSLQKRQAGN-RPG-SGVPNVPVKMSGFVFCRDKRD-A

As\_bidw MAQMRNVLLFVTL-FCYASTSN-AD-DNN-FAANEEELNH-EQLVELA-RRISDEVRIELE-LGF---QD-KN---DDELET-VKSLQKRQAGN-RPG-SGVPNVPVKMSGFVFCRDKRD-A

Op\_oedi MAQMRNVLLFVTL-FCYASTSN-AD-DNN-FAANEEEPNH-EQLVELA-RRISDEVRIELE-LGF---QD-KN---DDELET-VKSLQKRQAGN-RPG-SGIPNVPVKMSGFVFCRDKRD-A

Go\_pust MARVRSVLLLATL-CCYSSTSH-AD-DND-Y-GATEELNH-EQLVELG-RRITNEVRILLELE-LGI---QD-KND---QNQVDT-VKSLQKRQAVH-RAG-SGVPNVPVKMSGFVFCRDKRD-A

As\_love MARMRNIVLLFVTL-CCSAPSH-AN-DNG-Y-DATEERNR-EQLVELE-RIITD-VRLLEHE-LGL---QH-TN---DELDT-VKSLQKRQADN-RPG-SGVPNVPVKMSGFAFCRDKRD-A

Op\_john MARVRNVILFVTL-CCHASISY-AE-D----ETTQELNK-EQLVEFA-RKIAGEVEFLKHT-LGM---QE-NN---GHQLDI-VKSLQKRQAV-----PMNVPVKMSGFVFCRDKRD-A

Op\_lyma MARVRNVILFVTL-CCHASVSH-AE-DIE-F-EGTQDFSH-EQLVEFA-RRIAGEMELLELE-LGI---QD-KN---EDQMDI-VKSLQKRQAVD-R---HGVPNVPVKMSGFAFCRDKRD-A



|           |       |                      |                       |                     |                      |            |               |              |              |          |          |          |       |       |       |       |
|-----------|-------|----------------------|-----------------------|---------------------|----------------------|------------|---------------|--------------|--------------|----------|----------|----------|-------|-------|-------|-------|
| Am_cipu   | QLVRR | -----                | -SAQ--AKPVKLAGFAFGKR  | -GQLVKR             | SSDDQLMEEDET         | ---EKR     | GALDAAFTFKRR  | ---DPSALS    | SAFSFGKR     | RDPM     | -GLNAL   | TFGKR    |       |       |       |       |
| Am_cten   | QLVRR | -----                | -SAQ--AKPVKLAGFAFGKR  | -GQLVKR             | SSDDQLMEEDET         | ---EKR     | GALDAAFTFKRR  | ---DPSALS    | SAFSFGKR     | RDPM     | -GLNAL   | TFGKR    |       |       |       |       |
| Am_cons_1 | QLVRR | -----                | -SAQ--AKPVKLAGFAFGKR  | -GQLVKR             | SSDDQLLEEEET         | ---EKR     | DALH-AFTFKRR  | ---DPSALS    | SSFTFGKR     | RDPM     | -GLSALT  | TFGKR    |       |       |       |       |
| Am_cons_2 | QLVRR | -----                | -SAQ--AKPVKLAGFAFGKR  | -GQLVKR             | SSDDQLLEEDDT         | ---EKR     | DALH-AFTFKRR  | ---DPSALS    | SSFTFGKR     | RDPM     | -GLSALT  | TFGKR    |       |       |       |       |
| Op_filo   | PLVRR | -----                | -SAQ--AKPVKLTGFQFGKR  | -GQLEKR             | SADDKLMEEDET         | ---EKR     | AALD-AFTFKRR  | ---DPSGL     | TAFSFGKR     | RDPL     | -GLNAL   | TFGKR    |       |       |       |       |
| Mi_grac   | PLVRR | -----                | -SAP--SKPVKLSGFIFGKR  | -AQLEKR             | SADDKLMEEDET         | ---EKR     | AFD-AFTFKRR   | ---DPSGL     | SAFSFGKR     | RDPT     | -RLSALT  | TFGKR    |       |       |       |       |
| Am_squa   | PLVRR | -----                | -SAQ--SKPVKLAGFAFGKR  | -GQLEKR             | SADDKLMEEDET         | ---EKR     | ALSS-AFTFKRR  | ---DPSGL     | SALTFGKR     | RDPM     | -GLSALT  | TFGKR    |       |       |       |       |
| Op_resi   | QLVRR | -----                | -SASSGAKPVKLAGFAFGKR  | -RAGQLVKR           | SSDDQLVEEDGA         | ---EKR     | AAMD-AFTFKRY  | ---DPSGL     | SAFSFGKR     | RDPL     | -GLSALT  | TFGKR    |       |       |       |       |
| Op_savi   | QLVRR | -----                | -SASSGAKPVKLAGFAFGKR  | -RAGQLVKR           | SSDDQLLHEDGA         | ---EKR     | AAMD-AFTFKRY  | ---DPSGL     | SAFSFGKR     | RDPL     | -GLSALT  | TFGKR    |       |       |       |       |
| Op_abys   | SLVRR | -----                | -SASSGGSKPVKLAGFAFGKR | -GQLVKR             | SSDDQLLEEDST         | ---EKR     | AAMD-AFTFKRM  | ---SDPSGL    | SAFSFGKR     | RDPM     | -GLSALT  | TFGKR    |       |       |       |       |
| Op_angu   | QLVRR | -----                | -SAKSGDKPVKLAGFAFGKR  | -GQPVKR             | STNDELEEDGE          | ---EKR     | AAMD-AFTFKRI  | ---SDQE      | -LSPFS       | FEKRDPT  | -GLSALT  | TFGKR    |       |       |       |       |
| Op_scha   | QLVRR | -----                | -SAGSGSKPVKLAGFAFGKR  | -GQLVKR             | SSDDQLEEEDEA         | ---EKR     | AAMD-AFTFKRL  | ---SKDPS     | ALS          | SAFNFGKR | RDPM     | -GLSALT  | TFGKR |       |       |       |
| Op_reti   | QLVRR | -----                | -SAGSSSKPVKLAGFAFGKR  | -GQLVKR             | SSDDQLEAEDEA         | ---EKR     | AAMD-AFTFKRL  | ---SNDPS     | ALS          | SAFNFGKR | RDPM     | -GLSALT  | TFGKR |       |       |       |
| Op_lame   | QLVRR | -----                | -SAGAGSKPVKLAGFAFGKR  | -GQLVKR             | SSDDQLEEEDEA         | ---EKR     | ASMD-AFTFKRL  | ---SNDPS     | ALS          | SAFSFGKR | RDPM     | -GLSALT  | TFGKR |       |       |       |
| Op_impr   | QLVRR | -----                | --SASASKPVKLAGFAFGKR  | -GQPVKR             | SSDDQLEEQDA          | ---EKR     | AAMD-AFTFKRP  | ---SGDPT     | GL           | SAFNFGKR | RDPM     | -SLSALT  | TFGKR |       |       |       |
| Op_bisp   | QLVRR | -----                | -SAVAGSKPVKLAGFAFGKR  | -GQLVKR             | SSDDQLEEQDDA         | ---EKR     | AAMD-AFTFKRP  | ---SGDPT     | GL           | SAFSFGKR | RDPM     | -SLSALT  | TFGKR |       |       |       |
| Op_vall   | QLVRR | -----                | -SAGNTGSKPVKLAGFAFGKR | -GQLVKR             | SSDDQLEDDETAATE      | ---EKR     | ASMD-AFTFKRP  | ---SSD       | ---          | LSSFS    | FSGKRDP  | ---LSALT | TFGKR |       |       |       |
| Op_brev   | QLVRR | -----                | -SAGAGSKPVKLAGFAFGKR  | -GQLVKR             | SSDDQLEEQTT          | ---EKR     | ANLD-AFTFKRK  | ---AGD       | ---          | LSAFS    | FSGKRDP  | ---LSALT | TFGKR |       |       |       |
| Ba_hero   | QLVRR | -----                | -SAGAGNPKPVKLAGFAFGKR | -NQPVKR             | SSDDRTEEEE           | ---DKR     | GAMD-AFTFKRP  | ---SGNPT     | GL           | SAFSFGKR | REP      | VGSL     | SALT  | TFGKR |       |       |
| Op_appr   | QLVRR | -----                | -SAGAGSKPVKLAGFAFGKR  | -NQPVKR             | SSDDRADEEE           | ---DKR     | GAMG-AFTFKRP  | ---SGNPS     | GL           | SAFSFGKR | REPL     | GL       | SALT  | TFGKR |       |       |
| Op_macu   | QLVRR | -----                | -SAGTGSKPVKLAGFAFGKR  | -N-PVKR             | SSDDRADEEE           | ---DKR     | GAMD-AFTFKRP  | ---SGNPS     | GL           | SAFSFGKR | REP      | VGSL     | SALT  | TFGKR |       |       |
| Op_vivi   | QPVRR | -----                | -SAGAGGKPVKLAGFAFGKR  | -NPLVKR             | SSDDKVEEQD           | ---DKR     | GAMD-AFTFKRP  | ---PSVSGD    | PSALS        | SAFSFGKR | RD       | PVGS     | SALT  | TFGKR |       |       |
| Op_cyli   | QLVRR | -----                | -SAGAGRKPVKLAGFAFGKR  | -NQLVKR             | SSDDQAEEEE           | ---DKR     | GAMD-AFTFKRP  | ---SGDPT     | GL           | SAFSFGKR | RD       | PVGS     | SALT  | TFGKR |       |       |
| Op_wend   | NLVRR | -----                | -SAGAGSKPVKLAGFAFGKR  | -NQPVKR             | SSDDQIEEEE           | ---DKR     | GAMD-AFNFAKP  | ---SGDPS     | GL           | SAFSFGKR | RD       | PVGS     | SALT  | TFGKR |       |       |
| Op_plic   | QLVRR | -----                | -SA---KPVKLAGFQFGKR   | -GQPVKR             | SSDDQAEHEE           | ---EKR     | GRMD-AFAFKRL  | ---SGDPS     | ALS          | SAFSFGKR | RD       | PVSS     | SALT  | TFGKR |       |       |
| Op_fune   | QLVRR | -----                | -SA---SKPVKLAGFAFGKR  | -GQPVKR             | SPDDQAEED            | ---EKR     | GPMD-AFAFKRL  | ---SGDPS     | ALS          | SSFSFGKR | RD       | PV       | SGLS  | SALT  | TFGKR |       |
| Op_perf   | QLVRR | -----                | -SAG--SKPVKLAGFAFGKR  | -GQPVKR             | SSDDQLQEED           | ---EKR     | GALD-AFAFKRR  | ---SGDPS     | GL           | SAFSFGKR | RD       | PASS     | SALT  | TFGKR |       |       |
| Cl_cana   | QLVRR | -----                | -SAGAGSKPVKLAGFAFGKR  | -GQPVKR             | SSDDQAEHEE           | ---DKR     | GAMD-AFTFKRL  | ---SGGKS     | ALS          | SAFSFGKR | RD       | PVGS     | SALT  | TFGKR |       |       |
| Op_exim_1 | QLVRR | -----                | -SAGAGSKPVKLAGFAFGKR  | -NQPVKR             | SSDDQAEHEE           | ---DKR     | GAMD-AFTFKRL  | ---PGDPS     | ALS          | SAFSFGKR | RD       | PVSS     | SALT  | TFGKR |       |       |
| Op_exim_2 | QLVRR | -----                | -SAGAGSKPVKLAGFAFGKR  | -NQPVKR             | SSDDQAEHEE           | ---DKR     | GAMD-AFTFKRL  | ---PGDPS     | ALS          | SAFSFGKR | RD       | PVSS     | SALT  | TFGKR |       |       |
| Op_liod   | QLVRR | SAS--SGSKPKMSGFAFGKR | RDVQLVRR              | -----               | -SAGAGSKPVKLAGFAFGKR | -GQPVKR    | SSDDQAEHEE    | ---DKR       | GALD-AFHFKRL | ---SNDPS | GL       | SAFSFGKR | -EPMG | SL    | SGL   | TFGKR |
| Op_prol   | QLVRR | -----                | -SAGAGSKPVKLAGFAFGKR  | -GQPVKR             | SSDDQAEHEE           | ---DKR     | GALD-AFTFKRL  | ---SSDP      | ---          | LSAFN    | FGKR     | REP      | VSS   | SALT  | TFGKR |       |
| As_tubi   | PLVRR | SAG--AGAS-KMSGFAFGKR | RDSELVKR              | SA---GKPVKLAGFAFGKR | -SQLVKR              | SSDNVAENEE | ---EKR        | GAMD-AFTFKRL | ---SGDPS     | GL       | STFSFGKR | RNP      | PGT   | SALT  | TFGKR |       |
| As_bidw   | PLVRR | SAG--AGAS-KMSGFAFGKR | RDSELVKR              | SA---GKPVKLAGFAFGKR | -SQLVKR              | SSDNVAENEE | ---EKR        | GAMD-AFTFKRL | ---SGDPS     | GL       | STFSFGKR | RNP      | PGT   | SALT  | TFGKR |       |
| Op_oedi   | PLVRR | SAG--AGAS-KMSGFAFGKR | RDSELVKR              | SA---GKPVKLAGFAFGKR | -SQLVKR              | SSDNVAENEE | ---EKR        | GAMD-AFTFKRL | ---SGDPS     | GL       | STFSFGKR | RNP      | PGT   | SALT  | TFGKR |       |
| Go_pust   | PLVRR | SAKAAAGSA-KMSGFVFGKR | RDSELVKR              | SASAGSKPVKLAGFAFGKR | -SQLVKR              | SLDYEAENDE | ---EKR        | GAMN-AFTFKRL | ---SSDP      | -----    | AAVTF    | EKR      |       |       |       |       |
| As_love   | QLVRR | SAG--AGAA-KMSGFAFGKR | RDSEIVKR              | SAGARSKPVKLAGFAFGKR | -SQLVKR              | SSDNEEENDE | ---EKR        | GARN-AFTFKRL | ---SGNPS     | ALS      | SAFSFGKR | REP      | PGS   | SALT  | TFGKR |       |
| Op_john   | QLVRR | -----                | -SAG--SKPTKLAGFAFGKR  | -GQPVKR             | SSDNEAEDGQ           | ---EKR     | GTM-D-AFAFKRP | ---SGDPT     | GL           | SAFSFGKR | RD       | PMS      | SLS   | SAL   | AFGKR |       |
| Op_lyma   | PLVRR | -----                | -SAGAGSKPVKLAGFAFGKR  | -NPVKR              | SSDNEANDKE           | ---EKR     | VPMD-AFAFKRP  | ---SGDPT     | GL           | SAFSFGKR | RD       | PL       | SS    | SLS   | SAL   | AFGKR |

|           |                    |               |                    |                 |                  |               |                             |                  |
|-----------|--------------------|---------------|--------------------|-----------------|------------------|---------------|-----------------------------|------------------|
| Am_cipu   | -GMNPASGYSAFTFCR   | QMDNLHAFSFCR  | GMDPSGLSAFSFCR     | GRDPSALSASFSGCR | -----            | MG-M-NAFTFCR  | KREGL--E-EDGAFE-EENDD--EKR  | NQLSSLTGYTFCKR   |
| Am_cten   | -GMNPASRHSAFTFCR   | QMDNLHAFSFCR  | GMDPSGLSAFSFCR     | DRDPSALSASFSGCR | -----            | MG-M-NAFTFCR  | KREGL--E-EDGAFE-EENDD--EKR  | NQLSSLTGYTFCKR   |
| Am_cons_1 | -G-SP-SGYSAFTFCR   | QMDNLHAFSFCR  | GRDPSGLSAFSFCR     | GRDPSALSASFSGCR | -----            | MGGM-KAFTFCR  | KREDL--E-EEGAF-A-EENDD--EKR | NQLSSLTGYTFCKR   |
| Am_cons_2 | -G-SP-SGYSAFTFCR   | QMDNLHAFSFCR  | GRDPSGLSAFSFCR     | GRDPSALSASFSGCR | -----            | MGGM-KAFTFCR  | KREDL--E-EEGAF-A-EENDD--EKR | NQLSSLTGYTFCKR   |
| Op_filo   | --MSP-SGYSAFTFCR   | QMDNLHAFSFCR  | GMDPSSLALTFCKR     | GRDPSSLSASFSGCR | -----            | MG-M-NAFTFCR  | KRDEL--E-EDGAFE-DENDD--EKR  | SLSLTGYTFCKR     |
| Mi_grac   | -GMSP-SGYSAFTFCR   | GRMDNLNAFSFCR | GMDPSTLSASFSGCR    | GRDPSALSASFSGCR | -----            | MG-M-NAFTFCR  | KRDEL--E-EDGAFE-EENDD--EKR  | -----SYSKR       |
| Am_squa   | -GMNP-SGYSAFTFCR   | GRMDNLNAFSFCR | GMDPSGLSAFSFCR     | GRDPSALSASFSGCR | -----            | MG--PAFTFCR   | KRDE---EDGAFE-EENYD--EKR    | SRIGALTGLTYCKR   |
| Op_resi   | -GMNP-SGMSAFAFSGCR | RMEPLSAFSGCR  | GRKRGMDPSGLSAFSFCR | GMDPSGLSAFSFCR  | -----            | MG-M-NAFTFCR  | KREGG--EEEDPAFE-EENNN--EKR  | AGYNGLSQFTFCR    |
| Op_savi   | -GMNP-SGMSAFAFSGCR | RMEPLSAFSGCR  | GRKRGMDPSGLSAFSFCR | GMDPSGLSAFSFCR  | -----            | MG-M-NAFTFCR  | KREGG--EEEDPAFE-EENNN--EKR  | AGYNGLSQFTFCR    |
| Op_abys   | -GMP-SGMSAFAFSGCR  | RMEPLSAFSGCR  | GRKRGMDPSGLSAFSFCR | GMDPLGLNAFSFCR  | -----            | MG-M-NAFTFCR  | KREG--EEEDAAL-EEDNND--EKR   | AGYNGLSQFTFCR    |
| Op_angu   | -GMHP-SSMSAFAFSGCR | RMDPLSAFSGCR  | RAMDPAFSAFSGCR     | GMDPSALSASFSGCR | GTGPS-GLSAFSGCR  | MG-M-NAFTFCR  | KREG--E-EETAFAKNTND--EKR    | AGYNGLSAGTYFCR   |
| Op_scha   | -GMDP-SGFAFSGCR    | R-EPYSAFSGCR  | GMDPSALSASFSGCR    | ARDPSALSASFNGCR | -----            | MCGMTNAFTFCR  | KREGL---EEDGAFE-EENQDEE     | KRGGYNGIAGTYFCR  |
| Op_reti   | -GMDP-SGFAFSGCR    | R-EPYSAFSGCR  | GMDPSALSASFSGCR    | ARDPSALSASFNGCR | -----            | MCGMTNAFTFCR  | KREDL---EEEGAFE-EENQDEE     | KRGGYNGISGYTFCKR |
| Op_lame   | -GMNP-SGFAFSGCR    | R-EPLSAFSGCR  | GMDPSALSASFSGCR    | GRDPSALSASFNGCR | -----            | ANMGMTNAFTFCR | KRDD---EEDGAFE-EENQDEE      | KRGGYNGISGYTFCKR |
| Op_impr   | -GMDP-SGFAFSGCR    | R-DPFSAFSGCR  | GMDPTALSASFSGCR    | RDPSALSASFSGCR  | -----            | MGGLTNAFTFCR  | KRDDT---EEDGAFE-EENNN--EKR  | DFSALAGTYFCR     |
| Op_bisp   | -GMDP-SGFAFSGCR    | R-DPFSALTFCKR | GMDPSALSASFSGCR    | GRDPSALSASFNGCR | -----            | MGGLTNAFTFCR  | KRDDA---EEDGAFE-EDNND--EKR  | GFNGISGYTFCKR    |
| Op_vall   | -GMNP-AGFNAFSGCR   | R-DPFSAFSGCR  | GRDPSALGAFSGCR     | GRDSNALGAFSGCR  | -----            | --GM-DAFTFCR  | KREDL--D-VEGAF--DENED--EKR  | AYNNGMSGFSGCR    |
| Op_brev   | -GMKP-SAFDAFSGCR   | R-DPLSAFSGCR  | GMDPNALGAFSGCR     | GRD-NALGAFSGCR  | -----            | --GM-DAFTFCR  | KRDD---EEGAFE-DED---EKR     | AYNPI SAYTFCKR   |
| Ba_hero   | -GMDP-AGFSAFNGCR   | R-DPLSAFNGCR  | GMDPSGLSAFSFCR     | GRDPSGLSAFSFCR  | SRVP--SLSAFDFCKR | --G-M-DAFTFCR | KREDL--D-EEGAFE-DENDD--EKR  | GFNGISGYTFCKR    |
| Op_appr   | -GMDP-AGFSAFNGCR   | R-DPLSAFNGCR  | GMDATGLSAFSFCR     | GRDPSGLSAFSFCR  | GRVP--SLSAFDFCKR | --G-M-DAFAFCR | KREDL--D-EDGAFE-DENED--EKR  | GFNGISGYTFCKR    |
| Op_macu   | -GMDP-SGFAFNGCR    | R-DPLSAFAFCR  | GMDASGLSAFSFCR     | GRDASGLSAFNGCR  | GRVP--QLSAFDFCKR | --G-M-HAFTFCR | KREDL--D-EEGAFEDDENDD--EKR  | GFNGISGYTFCKR    |
| Op_vivi   | -A-NP-SGFAFNGCR    | R-DPLTAFNGCR  | AMDASGLSAFSFCR     | GRDSNGLSAFSFCR  | GRMP--SLGAFDFCKR | --G-M-DAFTFCR | KREEL--D-DEGAFE-EENED--EKR  | NFNGISGYTFCKR    |
| Op_cyli   | -GMDP-AGYSAFSGCR   | R-DPLSAFSGCR  | GMDATGLSAFSFCR     | GRDPSGLSAFNGCR  | GRMP--SLSAFDFCKR | --G-M-DAFTFCR | KREDL--D-DEGAFE-DENDD--EKR  | GFNGISGYTFCKR    |
| Op_wend   | -AMEP-AGFAFSGCR    | R-DPLGAFSGCR  | GMDASGLSAFNGCR     | GRDATGLSAFSFCR  | GRVP--SLSAFDFCKR | --GRM-DAFAFCR | KREDL--EEEDGAFE-DENDN--EKR  | GYQGISGYTLCKR    |
| Op_plic   | -GMDP-SGFAFNGCR    | R-DPLGAFSGCR  | GGMDATGLSAFSFCR    | GRDAAGLSAFSGCR  | GRMP--SLSAFDFCKR | --G-Y-DAFTFCR | KREGL--D-EEGAFE--ENDD--EKR  | --FNGISGLTFCKR   |
| Op_fune   | -GMDP-SGFAFNGCR    | R-DPLGALTFCKR | GGMDASGLSAFSFCR    | GRDGAGLSAFSGCR  | GRMP--SLSAFDFCKR | --G-F-DAFTFCR | KREGL--DEEGAFE--ENDD--EKR   | --FNGISGLTFCKR   |
| Op_perf   | -GMDP-SGFNAFNGCR   | R-DPLSAFNGCR  | GGMDTGLSAFSFCR     | GRDASGLSAFSFCR  | GRMP--SLSAFDFCKR | --G-F-DAFTFCR | KREGL--DEEGAF--DENDD--EKR   | --FNGISGLTFCKR   |
| Cl_cana   | -GMDP-SGFAFNGCR    | R-NPLSDFNLCKR | GGMDASGLSAFSFCR    | GRDATGLSAFSFCR  | GRMP--SLSAFDFCKR | --G-M-DAFTFCR | KREGL--D-EEGAFE-EENDD--EKR  | --FNGISGYTFCKR   |
| Op_exim_1 | -GMDP-SGFAFNGCR    | R-DPLSAFNGCR  | GGMDASGLSAFSFCR    | GRDAAGLSAFSGCR  | GRMP--SLSAFDFCKR | --G-M-DAFTFCR | KREGL--D-EEGAFE-DENDD--EKR  | --FNGISGYTFCKR   |
| Op_exim_2 | -GMDP-SGFAFNGCR    | R-DPLSAFNGCR  | GGMDASGLSAFSFCR    | GRDAAGLSAFSGCR  | GRMP--SLSAFDFCKR | --G-M-DAFTFCR | KREGL--D-EEGAFE-DENDD--EKR  | --FNGISGYTFCKR   |
| Op_liod   | -GMDP-SGLGAFSGCR   | R-DPLGAFSGCR  | GGMDASGLSAFSFCR    | GRNPTGISAFSGCR  | GRVP--NLSAFDFCKR | --G-M-DAFTFCR | KREDM--D-EEGAFE-DENEN--EKR  | AYNNGISGLTFCKR   |
| Op_prol   | -GMDP-SGFAFSGCR    | R-DPLGAFSGCR  | GGLDASGLSAFSFCR    | GRDPSGMGAFSGCR  | GRVP--NLSAFDFCKR | --G-M-DAFTFCR | KREDM--D-EEGAFE-EENDD--EKR  | AYSGISGYTFCKR    |
| As_tubi   | -GMYP-SGLSAFNGCR   | R-DPLSTFSGCR  | GVE-SGLSAFNGCR     | GYDQSGLSAFSGCR  | MPTGSLSAFNGCR    | --G-M-NAFTFCR | KREDL--D-EEAAFE-DENND--EKR  | AFNGMSGYTFCKR    |
| As_bidw   | -GMYP-SGLSAFNGCR   | R-DPLSTFSGCR  | GVE-SGLSAFNGCR     | GYDQSGLSAFSGCR  | MPTGSLSAFNGCR    | --G-M-NAFTFCR | KREDL--D-EEAAFE-DENND--EKR  | AFNGMSGYTFCKR    |
| Op_oedi   | -GMYP-SGLSAFNGCR   | R-DPLSTFSGCR  | GME-SGLSAFNGCR     | GYDQSGLSAFSGCR  | MPTGSLSAFNGCR    | --G-M-NAFTFCR | KREDL--D-EEAAFE-DENND--EKR  | AFNGMSGYTFCKR    |
| Go_pust   | -GMNP-SGISAFNGCR   | R-DPSTFSGCR   | GMESTGLSAFNGCR     | GYDQSGLSAFSGCR  | WPTNSLSAFDFCKR   | --G-M-NAFTFCR | KRYL--D-EEGAF--DENKD--EKR   | AYNAMYGYTFCKR    |
| As_love   | -GMNP-SALSAFNGCR   | R-DPLSAFSGCR  | GMQ-SGLSAFNGCR     | GYDENGSSFSFCR   | MPTGSLSGDFCKR    | --G-M-DAFTFCR | KREDL--N-EEGAF--DENND--EKR  | AFNGISGYTFCKR    |
| Op_john   | -GMDR-SGFNAFSGCR   | R-DPLSAFSGCR  | GMD--RLNAFNGCR     | GRNLGSLAFDFCKR  | -----            | --G-M-DAFAFCR | KREN--D-EDGAFE-DED---EKR    | AFDGLSAYAFCKR    |
| Op_lyma   | -GMDP-SGFNAFSGCR   | R-DPLSAFSGCR  | GMD--GLNAFNGCR     | GRDSALSASFNGCR  | GRMPMGLSAFDFCKR  | --G-M-DAFAFCR | KREDL--D-EEGAF--DENDD--EKR  | AFNGLSGYAFCKR    |

Am\_cipu DTQ-----AAAD--DNTLN-QEETLRTN---  
Am\_cten DTQ-----AAAE--DNTLN-QEETLRTN---  
Am\_cons\_1 DTQE-----AAAAD--DNTLN-QEETLRTN---  
Am\_cons\_2 DTQE-----AAAAD--DNTLN-QEETLRTN---  
Op\_filo DTH-----EAAAE--DNALN-QEETMRTD---  
Mi\_grac DTQ-----EAAAE--DNTLY-QEETLRTD---  
Am\_squa DTQ-----EAAAD--DNTLN-QEETLRTE---  
Op\_resi DTQ-----AAAAE---ETLNHNDETLRTD---  
Op\_savi DTQ-----AAAAE---ETLNHNDETLRTD---  
Op\_abys DTQ-----AAAE---ETLNHNDEILRTD---  
Op\_angu DTE-----AVE---ERLN-NDETLRDD---  
Op\_scha DTK-----AAAD---ESLNHNEETLRTD---  
Op\_reti DTK-----AAAD---ESLNHNEETLRTD---  
Op\_lame DTK-----AAAE---DTLNHNDETLRTD---  
Op\_impr DTK-----AAAD---DTLNQNEETLRTD---  
Op\_bisp DTK-----AAAE---DRLNHNDEIRTE---  
Op\_vall DTK-----AAAE---DTLNENDETLRTD---  
Op\_brev DTE-----AAGD---DTLNHNEETLRTD---  
Ba\_hero DTN-----AAAEDDADTLNHNDETLRTD---  
Op\_appr DTD-----AAAEDDADTLNHNDETLRTN---  
Op\_macu DTN-----AAAEDDADTLNHNDETLRTD---  
Op\_vivi DTH-----AAAADNADTLNHNDETLRTD---  
Op\_cyli DTN-----AAAE--DADTLNHHKDETLRTD---  
Op\_wend DTN-----AAAE--DAERLDHNDETLRTD---  
Op\_plic DTD-----AAAN--DADTLN--NDDILRTD---  
Op\_fune DTD-----AAAN--DADTLN--TDDTLRTN---  
Op\_perf DTN-----AAAD--EADILNHNDEILRTD---  
Cl\_cana DTN-----AAAE--DADTLNHNDETLRTD---  
Op\_exim\_1 DTN-----AAAE--DADTLNHHDETLRTD---  
Op\_exim\_2 DTN-----AAAE--DADTLNHHDETLRTD---  
Op\_liod DTN-----AAVE--NADTLNHNDETLRTD---  
Op\_prol DTN-----AAAE--DADTLNHNDETLRTD---  
As\_tubi DTD-----AADD--TEDTLNHNDEILRTDN--  
As\_bidw DTD-----AADD--TEDTLNHNDEILRTDN--  
Op\_oedi DTD-----AADD--TEDTLNHNDEILRTDN--  
Go\_pust DTD-----AAED--AEETLNHNDETLRTDN--  
As\_love DTE-----EA---EDTLNHNADTLRTDN--  
Op\_john DT-----VAAD---DTLNHNEETLRTDN--  
Op\_lyma DTD-----AAAE---DTLNHNDETLRTDN--

L-type SALMFa

Am\_cons\_1 MRLQPRFVFFICALVPIVLAGTIPRRNSGGKEVPTSFYHDVVLVKDQ-QMENEDRDIEERRSGRGRTY-LNSGLLFGKRFDDTG-DFLLT-DD-----DL  
Op\_pilo MRLQPRFV-FFICALVPIVLAGTIPRR--GGNEVPA-FNYDAMVKDK-QMENEDRDIEERRSGR-RTY-LNSGLLFGKRFDET--GDFLT-DE-----EE  
Op\_resi MRLIPGLV-LFICALVPIIAAGTIPRR--TSKELPT-YNYDAMVKDQ-QMENEDREIEERRSGRSRTY-LNSGLLFGKRFETA-DDFIN-ED-----NT  
Op\_savi MRLIPGLV-LFICALVPIIAAGTIPRR--TSKELPT-YNYDAKVKDQ-QMENEDREIEERRSARSRTY-LNSGLLFGKRFETA-DDFIN-ED-----NT  
Op\_abys MRLQPRLV-LFICALVPIIAAGTIPRR--TSKELPT-YNYDAMVKDQ-QMENEDREIEERRSGR-RTY-LNSGLLFGKRFETA-DAFIN-DD-----DT  
Op\_angu MRLQARLV-LFICAIIPVIAAGVPPRR--ASKESPT-YNYDAMVKDP-QMANQDKEIEERRSGRSRTY-LNSGLLFGKRFEEAA-DDFIN-DE-----NT  
Op\_caes MRLQARLV-LFICALIPVIAAGVAPRR--STKELPT-YNYDAMVKDP-QMANQDREIEERRSGRSRTY-LNSGLLFGKRFEEAA-DDFIN-DD-----DP  
Op\_impr MRLQPRLV-FFICALVPIIAAGTIPRR--TGIEVPT-FNYDAKVKDQ-QMENEDREIEERRSGR-RTHSLNSGLLFGKRFEEET--EDFLN-DD-----DT  
Ba\_hero MRLQPLLV-FFICALVPFVAGTIPRR---NFEVFN-YNYDAMVKDQ-QMENEDKEVEERRSGR-RTHSLNSGLLFGKRFEEET--DDFIN-DD-----ET  
Op\_plic MRLQPLLV-FFICAIVPFVAGTIPRR--TGFEVFN-YNYDAMVKNQ-QMENEDKEVEERRSGR-RHTLNSGLLFGKRFEEET--DDFIN-DD-----EL  
Op\_fune MRLQPLLV-FFICAIVPFVAGTIPRR--TGFEVFN-YNYDAMVKNQ-QMENEDKEVEERRSGR-RHTLNSGLLFGKRFEEET--DDFIN-DD-----ES  
Op\_perf MRLQPLLV-FFICAIVPFVAGTIPRR--TGFEVFN-YNYDAMVQDK-PMENQNKVEVEERRSGR-RHTLNSGLLFGKRFEEET--DDFIN-DD-----ES  
Cl\_cana MRLQPLLV-FFICAIVPFVAGTIPRR--TGFEVFN-YNYDAMVKDQ-QMENEDKEVEERRSGR-RHTLNSGLLFGKRFEEET--DDFIN-DD-----ET  
Op\_liod MRLQPLLV-FVICALVPFVAGTIPRR--TGFEVFN-YNYDAMVKDQ-QMENEDKEIDERRSGR-RHTLNSGLLFGKRFEEET--DDFIN-DD-----ET  
As\_tubi MRLQPLEV-CFICALVPFVATGRIPRR----LEAPQ-YNYAAMVKS--HLEDDNKEIEERRSGRRNPNLSLNSGLFFGKRFDDGT--DEFVN-DD-----ET  
As\_bidw MRLQPLEV-CFICALVPFVATGRIPRR----LEAPQ-YNYAAMVKS--HLEDDNKEIEERRSGRRNPNLSLNSGLFFGKRFDDGT--DEFVN-DD-----ET  
Op\_oedi MRLQPLEV-CFICALVPFVATGRIPRR----LEAPQ-YNYAAMVKS--HMEDDNKEIEERRSGRRNPNLSLNSGLFFGKRFDDGT--DEFVN-DD-----ET  
As\_love MRLQPLEV-CFICAIVPFVATGRLPRR----FEAPQ-YNYAAMVKDR-TMEDDNKEIEERRSGRRNPPGLNSGLFFGKRFDDGT--DEFVN-DD-----ET  
Gl\_sp\_no MRLQPLLV-FCICALVPFAATGTIPRR-RSGFEGAN-YNYDVLVKDTAQLEDEDKEIEERRSGR-RNPNLSLNSGLIFGRRFEETAADDFLN-DD-----ES  
Op\_john MRLQPLLV-CFICALVPFVATGTIPRR--TAFEGHN-YNYDAMVKDT-QMENENKEIDERRSGRRRGPALNSALIFGKRLEGT--DDFLN-DD-----ET

Am\_cons\_1 DEDTRHFNVETRGRNRLPFHSALMQCKRTPPLDEEDMLTSRSKRRSRP--LFHSGIMMGKRYPSLFSEDAADD-----KRKS---RLRWSDGMLFGK-  
Op\_pilo D--NRHFNVETIRGRNRLPFHSALMQCKRT-PLERDL-MSRSKRRTRP--VFHSGIMMGKRYQL-YSDDAVD-----KRKS---RLRWSDGMLFGK-  
Op\_resi R-QQQQFTVDIRGRNRLPFHSGLMQCKRS-PEVEREP-ESGNRKRTRP--AFHSAMLLGKRFPN-FEFDAADD--DLEEFKRKAS--RLRWSGTGTFGRK  
Op\_savi RQQQQQFTVDIRGRNRLPFHSGLMQCKRN-PQDEREP-ESSI-KRGRP--KFHSAMAFGKRYPN-FEFDAADD--DLEEFKRKAS--RLRWATGTQFGRK  
Op\_abys R-QQQQFTVDIRGRNKLPFHSGLMQCKRS-PQQENGP-DSNDWKRTRP--KFHSAMLLGKRLPN-FEFDAADDAQDIDEFKRKS--RLRWSNGMAFGRK  
Op\_angu N-QQQQFTVEVRGRSKLPPHFSALMQCKRS-SLEDEF--DSSFSKRGKQAKFHSAMLLGKRYPE-FGIDAVDGVQNIDEFKRKS--RLRWSNGMAFGRK  
Op\_caes N-QPQQFTVEVRGRSKLPPHFSALMQCKRN-SLEDES--DSSFNKRKPKAKFHSAMLLGKRYPE-FGINEVDDHQDIEEFKRKS--RLRWSNGISFGRK  
Op\_impr R----EINVEIRGRNRLPFHSALMQCKRT-PQQEE---ENSAKRRSRP--VFHSGFMMGKRFPN--EYDAADDA-NIEEFKRKAA--RLRWSNGMQFGK-  
Ba\_hero R----QINVDIRGRNKLPPHSGLMQCKRN-PEQEE---ADNAKRRTRP--IFHSGFMMGKRYPE---SESDDD--LEEFKRKAG-ARLRWSDGMQFGK-  
Op\_plic R----QFNVDIRGRNKLPPHSGLMQCKRD-PQQ-----GISDKRRSRP--AFHSGFMMGKRYPP---FEADND--LEEFKRKAG-QRLMWSNGISFGK-  
Op\_fune R----QFNVDIRGRNKLPPHSGLMQCKRD-SQQ-----EISNKRTRP--VFHSGFMMGKRYPP---YEIDND--LEDFKRKAG-QRLMWSNGISFGK-  
Op\_perf R----QINLDIRGRNKLPPHSGLMQCKRD-PQQEQ---REISNKRTRP--VFHSGFMMGKRYPP---YENDND--LEEFKRKAG-QRLMWSNGISFGK-  
Cl\_cana R----QINVDIRGRNKLPPHSGLMQCKRN-PQQDQ---QEISDKRRSRP--VFHSGFMMGKRYPP---YEIDND--LEEFKRKAG-QRLMWSNGIQFGK-  
Op\_liod K----QINVDIRGRNKLPPHSGLMQCKRN--QQSG---EEISAKRRTRP--VFHSGFMMGKRYQ---MESADDA-NLEDVKKRKYARLRWSDGMQFGK-  
As\_tubi R----QINMEIRGRSKLPPHSGLMQCKRN-QQEEEGM---TEKRRTRP--VFHSGIMMGKRYPS-----IGDANDLEEFKRKAG-QRLRWSNGMQFGK-  
As\_bidw R----QINMEIRGRSKLPPHSGLMQCKRN-QQEEEGM---TEKRRTRP--VFHSGIMMGKRYPS-----IGDANDLEEFKRKAG-QRLRWSNGMQFGK-  
Op\_oedi R----QINMEIRGRSKLPPHSGLMQCKRN-QQDEEGM---TEKRRTRP--VFHSGIMMGKRYPS-----IGDANDLEEFKRKAG-QRLRWSNGMQFGK-  
As\_love R----QINVDVRGRNKLPPHSGLMQCKRN-QQEEQGM---TEKRRSRP--VFHSGIMMGKRFPD-----DDLEEFKRKAG-QRLRWSDGMQFGK-  
Gl\_sp\_no R----QINLEIRGRSRLPFHSGLMQCKRN-PQQDDL----SVKRRSRP--AFHTGFLMGKRFPE-----ADDL-DLEEFKRRTG-QRLRFSDGMLFGK-  
Op\_john K----QIKVDIRGRSRLPFHTGFMQCKRN-PQQVDQ----SAKRRTRP--VFHSGFMMGKRFPD-----ADEM-DLEEFKRKAG--RLRFSDGMLFGK-

Tachykinin

Am\_cipu MASI-DWTKNLPAVALIVCGVLFCHGQAQLAAENTGALKEITDFDEETQ-YPELDL-DWIQPENAAFMK--LSPE---L-WENVPLQ-YVKRRKNQVFSAGLFGKR--SGWNQGHQNGLFGKRS-DWLEEFMSG---

Am\_cons\_1 MAFR-NWTQNLPAVALIVCGVLFCHGQGQLTADNTGALKEITFEFEDETQ-YPEVDL-DWIEPED-DFLNP-----ISF-NVPLQ-YVKRRKNQVFSAGLFGKR--SGWNQGHQNGLFGKRS-DWLEEFMSG---

Am\_cons\_2 MAFI-NWTQNLPAVALIVCGVLFCHGQGQLTADNTGALKEITFEFEDETQ-YPEVDL-DWIEPED-DFLNP-----ISF-NVPLQ-YVKRRKNQVFSAGLFGKR--SGWNQGHQNGLFGKRS-DWLEEFMSG---

Op\_filo MASI-DWTKRLPAITLIICGVLFCHGQAQLPADSNGALKEITFEFENDT---PELDL-DWIEPEDAAF-----LSWDNVPLQ-YVKRRKNQVFSAGLFGKR--SGWNQGHQNGLFGKRS-DWLEDYMSG---

Mi\_grac MASM-DWTKKLPAVALIICGVLFCHGQAQLSAENTGALKEITFEFEDENQ-YPELDL--VFEPEDAALLQPLLSPD---LSWENVPLQ-YVKRRKNQVFSAGLFGKR--SGWNQGHQNGLFGKRS-DWFEEYMSG---

Am\_squa MASI-DWTKKLPAAVLIICGVLFCHGQAQEFSAENAGALKEITDFENDETQ-FPEVDQRDWIEPEEADFLKPLLSQDFQVLNWNENVPLQ-YVKRRKNQVFSAGLFGKR--SGWNQGHQNGLFGKRS-DWLEEYMSG---

Op\_resi MVAI--WTRKLPAAVLFICGVLFCHGQGQLSHENNGALNEITFEFNDDTQ-YPELDP-EWIRQDDTAALKPILLSPE---LSWENVPLQ-YVKRKGKSVFSAGLFGKR--SSGWNQGHQNGLFGKRTSDWLDAYLSG---

Op\_abys MVAIKDWTRKLPAAVLFICGVLFCHVCGQLSPENTGALNEITQFNDDTQ-YPDLDP-EWITQEDTAALNPLLSPE---LSWENVPLQ-YVKRRKNQVFSAGLFGKR--SSGWNQGHQNGLFGKRTTDWLEEYLSG---

Op\_impr MASIKNWTKKLPAVALIICGVLFCHGQGQLSPENTGALNEITFEFDEETQ-YPELEP-DWIQPEDAAFLNPFLSPN---LSWENVPLQ-YVKRRKNQVFSAGLFGKR--SGWNQGHQNGLFGKR--NWLEEYMSG---

Op\_vall MASMKNWINKLIAVTLIICGVLFCHGQAQLSSENAGALTEITFEFDDTQ-YPDADP-DWIEPEDAAFLNPILLSPD---LSWENVPLQ-YVKRRKNQVFSAGLFGKR--SGWNQGHQNGLFGKRSNTWLEEYMSG---

Ba\_hero MASIKSWTKKLPAVALIICGVLFCHGQGQLTPENTGALNEITFEFDDTQ-YPDLDP-DWIEPEDAAFLGILLSPD---ISWENVPLQ-YVKRRKNQVFSAGLFGKR--SGWNQGHQNGLFGKRSNNWLEEYVSG---

Op\_cyli MASIKSWTKKLPAVALIICGVLFCHGQGQLSPENTGALNEITFEFDDTQ-YPDLDP-DWIEPEDAAFLGILLSPD---LPWEKVPLQ-YVKRRKNQVFSAGLFGKR--SGWNQGHQNGLFGKRSNNWLEEYVSG---

Op\_wend MASIKSWTKKLPAVALIICGVLFCHGQGQLTPEDPGALNEITFEFDDTQ-YPDLDP-DWIEPEDAAFLGILLSPD---LSWDNVPLQ-YVKRRKNQVFSAGLFGKR--SGWNQGHQNGLFGKRSNNWLEEYVSG---

Op\_plic MASMKCWTKKLPAIALIICGVLFCHGQAQLTADDTGALNEITFEFDDTQ-YPNLDP-DWIAPEDAFLGHILLSPD---LSWENVPLQ-YVKRRKHQVFSAGLFGKR--SGWNQGHQNGLFGKRSNNWLEEYVTG---

Cl\_cana MASMKSWTKKLPAIALIICGVLFCHGQAQLTPDNTGALNEITFEFDDTQ-YPNLDP-DWIEPEDAAFLGILLSPD---LSWENVPLQ-YVKRRKNQVFSAGLFGKR--SGWNQGHQNGLFGKRSNNWLEEYVTG---

Op\_prol MASIKSWTKKLPAVALIICGVLFCHGQGQLTPKGTGALNEITFEFDDTQ-YPDLDP-DWIEPDAAFLGILLSPD---LSWENVPLQ-YVKRRKNQVFSAGLFGKR--SGWNQGHQNGLFGKRSNNWLEEYVSG---

As\_tubi MASLKNWTRNLPALTLIICGSLFCHGQAQLAPDSTGALNDLTFEFDDETQ-FPKIDP-DWINQEDAVFLGILLSND---LTLDNVPLQ-YVKRRKNQVFSAGLFGKR--SGWNQGHQNGLFGKRSNNWLKEYVSG---

Gl\_sp\_no --SVKSWTRNQAVLIFCGVFFCSGQGQLTPDKSGALNELTFENDDTT-YPMDP-DWIDPEDAAFLAPVLTPE---LTWEHVPLQ-LVKRRKNVFSAGLFGKR--NGWNQGGQTGLFGKR--NWFEYVSSARA---

Op\_john MASVSWTKKLPAVALIICGVLFCHGQAQLTSDNTGALNEITGFNDDTQ-FPDLDP-DWIEQEDAAFLGILLSPD---SSWETVPLQ-FIKRRKNVFSAGLFGKR--SGWNEGHQNGLFGKRSNTWLEEYVTG---

Am\_cipu -----GE-DGDDNED-----SSSQYA-KK-QWNPNOQTGGLFGKRN-----DQFAKRTYGDMLQSLHDRVESAM-DKRKAA--ATLG--RVTKSSGQHVFRGTGGLFGKR--SVEDPGMQRALWPEDEQRRK---

Am\_cons\_1 -----GD-ESDDNSE-----SSSQYA-KK-QWN-DQKSGLFGKRS-----DQFARRTYSDMLQSLHDRVETAM-DKRKAAA--ATLG--RVTKSSGQHVFRGTGGLFGKR--SAEPPGMQRALWPEEEQRRK---

Am\_cons\_2 -----GD-ESDDNSE-----SSSQYA-KK-QWN-DQKSGLFGKRS-----DQFARRTYSDMLQSLHDRVETAM-DKRKAAA--ATLG--RVTKSSGQHVFRGTGGLFGKR--SAEPPGMQRALWPEEEQRRK---

Op\_filo -----TD-DSADNTE-----SNQYA-KK-QQNPNOQTGGLFGKRN-----DQVMRRTYDVMLQSLHDRVASAM-EKRKASA--ASLG--RVTKSSGQHVFRGTGGLFGKR--SAEPPGMQRALWPEDEQRRK---

Mi\_grac -----SE-DSGDNAE-----SSSQYA-KK-QWNPNOQTGGLFGKRN-----DQLTRRTYDVMLQNLHDRVESAM-DKRKAS--PAIG--RVTKSSGQHVFRGTGGLFGKR--SAEPPGMQRALWPEDEQRRK---

Am\_squa -----SD-DSGDNAE-----SSSQYA-KK-QWNPNOQTGGLFGKRS-----DQLARRTYDMLQNLHDRVESAI-DKRKAS--DSVG--RVTKSSGQHVFRSGLFGKR--SAEEDMQRALWPEDEQRRK---

Op\_resi -----DD-----EADHYSEKR-EWNNNQKT-GMFGKRH-----SDVEQRTYEDILQSLHDKLM-----DKRTA-----NVG--RVTKSSGQHVFRSAGLFGKR--SAEPEMEKALWPEDEQRRK---

Op\_abys -----NN-DEADNEY-----KR-EWNPNOQT-GMFGKRN-----SEVKRRTYGDILQSLQDKLV-----EKRGAA-----SLG--RVTKLSGQHVFRGTGGLFGKR--SAEPPDMEQALWPEEEQRRK---

Op\_impr -----RE-QEDAADA-----GNTQYAKRQ-WSPNOQTGGLWCKRN-----SEAARRTYEEMQLSLHDKVESAM-DKRSSP-----NLG--RVTKSSGQHVFRGTGGLFGKR--SVEEPEMQRALWPEDEQRRK---

Op\_vall -----RENDGDEAAD-----AVLQYAKRQRWNPNOQTGGLFGKRN-----SHVV-RTYEDMLQSLHDKVESAMVEKRRANAA--ANSG--RVTKSSGQHVFRGTGGLFGKR--STEDAGMQRALWPEDEQRRK---

Ba\_hero -----RD-DADKAD-----TTKYSKRQRWNPNOQTGGLFGKRN-----SEVVKRTYEEMQLTLQDKVESAM-DKRSPA-----NLG--KIFTKSSGQHVFRGTGGLFGKR--SAEPPDMQRALWPENEQRRK---

Op\_cyli -----RD-DADDEAD-----TTKYAKRQSWNPKQHTTGLFGKRN-----SEVKRRTYEEMKTLQDKVQSAM-DKRSA-----NLG--RVTKSSGQHVFRGTGGLFGKR--SAEPEMQRALWPENQRRK---

Op\_wend -----RD-GADGEAD-----TTKYAKRQ-WNPNOHTGGLFGKRN-----SEVIRRTYEEMQLSLQDKVQSASV-DKRSA-----NLG--RVTKSSGQHVFRGTGGLFGKR--SAEPEMQRALWPEEEQRRK---

Op\_plic -----RD-DED-KED-----ATNYSKRQRWNOQQTGGLFGKRN-----SDDLRTYEEMQLTLQDKVESAV-DKRSA-----NLG--RVTKSSGQHVFRGTGGLFGKR--SVEDPQMORALWPEDEQ-----

Cl\_cana -----RD-DED-EAN-----TTHYSKRQRWNPNOQTGGLFGKRN-----SDVLRRTYEEMQLTLQDKVESAV-DKRSPA-----NLG--RVTKSSGQHVFRGTGGLFGKR--SAEPPAMQRALWPEEEQRRK---

Op\_prol -----RD-DEKDKSD-----TTQYAKRQRWNOQQTSTGLFGKRN-----SEVVRRTYEDMLQSLQDKVETAM-DKRSA-----NLG--RVTKSSGQHVFRGTGGLFGKR--SVEDPGMQRALWPEDEQRRK---

As\_tubi -----SDEAAADSPLE---YGOAAGQYAKRQRWNPNOQON-GLFGKRN-----SDLVKRTYDNMLQTLREKVKSAI-DKRSA-----TNLG--RVTKSSGQHVFRAGLFGKR--SAEPELQORALWPENEQRRQTNA---

Gl\_sp\_no VDAAAANAD-EAVDTTDE---YGLNAGQYAKRQRWNOQOQP-GLFGKRNHAADDTAAARRTYKEMKTLQDKVESTI-DKRT-----NNPG--RVTKSSGQHVFRSGLFGKR--SAEAPGMQRALWPENEQRRK---

Op\_john -----RD-DVEEAGGTAQDFGQTAGQYAKRQRWNOQOQTGGLFGKRN-----TDDAARRTYEEMKTLQEKVASTM-DKRSP-----NNIG--RVTKSSGQHIFRTGGLFGKR--SAEAPGMERALWPENEQRRK---

TRH-1

Am\_cipu MQDLMNIRGGLV-PLFILVALSTVCLAD-----TE-GWPNE--EVETVDLLDDEEKRFAPGKRLLLLLKGREWVGEE---GY  
 Mi\_grac MQNLVTLRGGLG-PLFLEVVLSSVCLAEPEGELE--AANDITPLREDGWPDD--EGEAL--YEDEAKRFAPGKRLLLLLKGKRWVGGMP---EM  
 Op\_angu -----ICLLVLAGCMSCFGDPVDLE--NTANDITPLKE-GWPDN--EVQTFEELEDEVKRFAPGKRLLLLLKGREWVGGMP---EM  
 Op\_lame MQDPTIVRGCLV-PLFLLLALGTVCCLADPADLE--GTNDITPLRE-GWPDN--EDEALEELENEVKRFSPGKRLLLLLKGKRWVGGMP---EM  
 Op\_impr MQELIIVRGCLV-PLFFLLALGTVCCLADPADLE--GAANDITPLRE-GWPDGTGLEDDLELEDLNEVKRFSPGKRLLLLLKGKRWVGGFPLEFEN  
 Ba\_hero\_a MQEPRYNRGNLV-PLFLLLALGTVCCLAVPGDF---TANDITPLKEGGWLNNGLEDATLEELQNEVKRFSPGKRLLLLLKGKRWIGGMP---EL  
 Ba\_hero\_b MQEPRYNRGNLV-PLFLLLALGTVCCLAVPGDF---TANDITPLKEGGWLNNGLEDATLEELQNEVKRFSPGKRLLLLLKGKRWIGGMP---EL  
 Op\_vivi MQEPRYNRGNLV-PLFLLLALGTVCCLADHVDLD--DANDIAPLKE-GWPDNRLEDATLEELQNEVKRFSPGKRLLLLLKGKRWVGGMP---EM  
 Op\_perf MQELRYNRGNLV-PLFLLLALGTVCCLADPVNDI--SANDITPLRE-GWPDNELAEPEYEG---VKRFSPGKRLLFLGKRWVGGMP---EM  
 Cl\_cana MQELRYNRGYLV-PLFLLLALGTVCCLADPADLE--TTNDITPLRE-GWPDNGLEDETFEEMQ--VKRFSPGKRLLFLGKRWVGGMP---EM  
 Op\_exim\_1 MQELRYNRGYLV-PLFLLLALGTVCCLADPADLE--GTANDITPLRE-GWPDNGLEDETFEELQNEVKRFSPGKRLLFLGKRWVGGMP---EM  
 Op\_exim\_2 MQELRYNRGYLV-PLFLLLALGTVCCLADPADLE--GTANDITPLRE-GWPDNGLEDETFEELQNEVKRFSPGKRLLFLGKRWVGGMP---EM  
 Op\_liod\_a MQEARYRGCLG-PLFLLLALGTVCCLADPADLE--DAANDVTPLE-DWPGNDLEDVTLEELQYEVKRFSPGKRLLILLGKRWVGGMP---EM  
 Op\_liod\_b MQEARYRGCLG-PLFLLLALGTVCCLADPADLE--DAANDVTPLE-DWPGNDLEDVTLEELQYEVKRFSPGKRLLILLGKRWVGGMP---EM  
 As\_bidw MQEPRYNRSCLLSPLLLLLALGTV-CFADVGELE--DTANDVTPPKE-GWTNNALEDESILDALENEVKRFSPGKRLLLLLKGKRWVGGMP---ET  
 Op\_oedi MQEPRYNRSCLLSPLLLLLALGTV-CFADVGELE--GTANDVTPLE-GWTNNALEDESILDALGNEVKRFSPGKRLLLLLKGKRWVGGMP---ET  
 As\_love MQEPRYHRTCLLSPILLLLALGTV-CRADGGELD--RTANDIAPLSN-GWTNNALEDDALEVLDNEVKRFSPGKRLLLLLKGKRWVGGMP---EM  
 Op\_john MQESRYHRGCLL-PLFLLLALGTV-CLADLGDLELEGAANDIRPLRE-GWPENGL---EELNEVKRFSPGKRLLLLLKGKRWIGGMP---EM  
 Op\_lyma MQEPRYRGCLV-PLLLLLALGTV-CLADLGDLELEGTANDITPFRE-GWPDNGLEDETLELENEVKRFSPGKRLLLLLKGKRWIGGMP---EM

Am\_cipu SDDPFPDKRQFSAGKRQFSAGKRQFSAGKRQFSAGKRQFSAGKRQWLGEEEE---YDPEE-----NLNMETRQFSAGKRQFSAGKR---  
 Mi\_grac VDMPEE---RQFSAGKRQFSAGKRQFSAGKRQFSAGKR-----  
 Op\_angu VDMPET---RQFSAGKRQFSAGKRQFSAGKRQFSAGKRQFSAGKRQWVGGEEDDGLLENDDMKRQFSAGKRQFSAGKRQFSAGKRQFSAGKR---  
 Op\_lame VDMPET---RQFSAGKRQFSAGKRQFSAGKRQFSAGKR-----QWVGGEPEE--WEDEDMKRQFSAGKRQFSAGKRQFSAGKRQFSAGKR---  
 Op\_impr DDM-----KRQFSAGKRQFSAGKRQFSAGKRQFSAGKRQFSAGKRQWVGGFPLE--FEDEDVKRQFSAGKRQFSAGKRQFSAGKRQFSAGKR---  
 Ba\_hero\_a VDMPET---RQFSAGKRQFSAGKRQFSAGKRQFSAGKR-----QWVGGEPE--VLNQDEKRQFSAGKRQFSAGKRQFSAGKRQFSAGKRQFS  
 Ba\_hero\_b VDMPET---RQFSAGKRQFSAGKRQFSAGKRQFSAGKR-----QWVGGEPE--VLNQDEKRQFSAGKRQFSAGKRQFSAGKRQFSAGKR---  
 Op\_vivi VDMPET---RQFSAGKRQFSAGKRQFSAGKRQFAAGKR-----QWVGGEPE--FD-EAQKRQFSAGKRQFAAGKRQYAACKRQFTAGKR---  
 Op\_perf VDMPET---RQFSAGKRQFSAGKRQFSAGKRQFSAGKRQFSAGKRQWVGGEPE---DEEEKRQFSAGKRQFSAGKRQFSAGKRQFSAGKR---  
 Cl\_cana VDMPET---RQFSAGKRQFSAGKRQFSAGKRQFSAGKR-----QWVGGEPE--FDDEEEKRQFSAGKRQFSAGKRQFSAGKRQFSAGKR---  
 Op\_exim\_1 VDMPET---RQFSAGKRQFSAGKRQFSAGKRQFSAGKR-----QWVGQPDL--LDDEEEKRQFSAGKRQFSAGKRQFSAGKRQFSAGKR---  
 Op\_exim\_2 VDMPET---RQFSAGKRQFSAGKRQFSAGKRQFSAGKR-----QWVGQPDL--LDDEEEKRQFSAGKRQFSAGKRQFSAGKRQFSAGKR---  
 Op\_liod\_a VDMPET---RQFSPGKRQFSPGKRQFSPGKRQFSPGKRQFSPGKRQWVGGESE--FEDEEEKRQFSPGKRQFSPGKRQFSPGKRQFSPGKR---  
 Op\_liod\_b VDMPET---RQFSPGKRQFSPGKRQFSPGKRQFSPGKR-----QWVGGESE--FEDEEEKRQFSPGKRQFSPGKRQFSPGKRQFSPGKR---  
 As\_bidw VDMPET---RQFSAGKRQFSAGKRQFSAGKRQFSAGKR-----EWMDDGPD--LEEEDEKRQFSAGKRQFSAGKRQFSAGKRQFSAGKR---  
 Op\_oedi VDMPET---RQFSAGKRQFSAGKRQFSAGKRQFSAGKR-----EWMDDGPN--LEEEDEKRQFSAGKRQFSAGKRQFSAGKRQFSAGKR---  
 As\_love VDMPET---RQFSAGKRQFSAGKRQFSAGKRQFSAGKR-----EWM-DEPD--LDEEAKRQFSAGKRQFSAGKRQFSAGKRQFSAGKR---  
 Op\_john VDMPQT---RQFSAGKRQFSAGKRQFSAGKRQFSAGKR-----QWIGGAED---ENEEAKRQFSAGKRQFSAGKRQFSAGKRQFSAGKR---  
 Op\_lyma VDIPQT---RQFSAGKRQFSAGKRQFSAGKRQFSAGKR-----QWIGGEDD---ANEEAKRQFSAGKRQFSAGKRQFSAGKRQFSAGKR---

Am\_cipu ----QFSAGKRDWEEE-LTPEEL--MDMFQAPETRQFSAGKRQFSAGKRQFSAGKR-----QWVGGE--EEYDPEEMLNMATRQFSAGKR----  
Mi\_grac ----QFSAGKRDWEEETELTPEEF--MDMIPLPETRQFSAGKRQFSAGKRQFSAGKRQFSAGKRQWVGG-----QWVGGD--LEYEPEEDLDMETRQFSAGKRQFS  
Op\_angu ----QFSAGKRDWEDE-LTPEDL--MDILPAPETRQFSAGKRQFSAGKRQFSAGKR-----QWVGGE---YNPDDMLDMET-----  
Op\_lame ----QFSAGKRDWEE--LTPEDL--SDIVAAPETRQFSAGKRQFSAGKRQFSAGKR-----QWVGGM---ENPDDMLDMETRQFSAGKR----  
Op\_impr ----QFSAGKRDWEEENLTQDLLALDMLPLPETRQFSAGKRQFSAGKR-----QWVGGE--LEYDPNEMLDMETRQFSAGKR----  
Ba\_hero\_a AGRQFSAGKRDWEEENLTQDLLALDMLPLPETRQFSAGKRQFSAGKR-----QWVGGE--LEYDPNEMLDMETRQFSAGKR----  
Ba\_hero\_b ----QFSAGKRDWEEENLTQDLLALDMLPLPETRQFSAGKRQFSAGKR-----QWVGGE--LEYDPNEMLDMETRQFSAGKR----  
Op\_vivi ----QFSAGKRDWEEELTPEDLLALDMLPVPETRQFSAGKRQFSAGKRQFSAGKR-----QWVGGD--LEYNPEEMLDMETRQFSAGKR----  
Op\_perf ----QFSAGKRDWEEDNLTQDLLALGMLPIPETRQFSAGKRQFSAGKRQFSAGKR-----QWVGGE--QEYDPEDMLDMETRQFSAGKR----  
Cl\_cana ----QFSAGKRDWEEEDLTQDLLALEMLPAPETRQFSAGKRQFSAGKRQFSAGKR-----QWVGGE--TEYNPEDMLDMETRQFSAGKR----  
Op\_exim\_1 ----QFSAGKRDWEEEDLTQDLLALEMLPLPETRQFSAGKRQFSAGKRQFSAGKR-----QWVGGE--QEYNPEDMLDMETRQFSAGKR----  
Op\_exim\_2 ----QFSAGKRDWEEEDLTQDLLALEMLPLPETRQFSAGKRQFSAGKRQFSAGKR-----QWVGGE--QEYNPEDMLDMETRQFSAGKR----  
Op\_liod\_a ----QFSPGKREWDND-LTPEDLLAMGLLPAPETRQFSPGKRQFSPGKRQFSPGKR-----QWVGGE--LEYNPDDMLEMEARQFSPGKR----  
Op\_liod\_b ----QFSPGKREWDND-LTPEDLLAMGLLPAPETRQFSPGKRQFSPGKRQFSPGKR-----QWVGGE--LEYNPDDMLEMEARQFSPGKR----  
As\_bidw ----QFSAGKRDWEQD-LTPEDYLAMEMLPAPETRQFSAGKRQFSAGKRQFSAGKRQFSAGKRQWVGGD---YDPEELLDMETRQFSAGKR----  
Op\_oedi ----QFSAGKRDWEQD-LTPEEYLAMEMLPAPETRQFSAGKRQFSAGKRQFSAGKRQFSAGKRQWVGGD---YDPEELLDMETRQFSAGKR----  
As\_love -----DWRQD-LTPEELLAMEMLPAPETRQFSAGKRQFSAGKRQFSAGKRQFSAGKRQWVGGE---YDPEELLNMEARQFSAGKR----  
Op\_john ----QFSAGKRDWEEH-LTPEEYLAMEMLPAPETRQFSAGKRQFAAGKRQFSAGKR-----QWIGGQEEQEYNPDDFLDMETRQFSAGKR----  
Op\_lyma ----QFSAGKRDWEQN-LNPEEYLAMEMLPAPETRQFSAGKRQFSAGKRQFSAGKR-----QWIGGDEGQEYNPDDFLDMATRQFSAGKR----

Am\_cipu ----QFSAGKRQFSAGKRQWVGEE--AFLPEMDTRQFSAGKRQFSAGKRQFSAGKRQFSAGKR-----DDGETNILDEILEAEPDLAEA--E  
Mi\_grac ----DVLPEMDTRQFSAGKRQFSAGKRQFSAGKR-----D--SDTHILDEILEAHPDAA--AEGA  
Op\_angu AGRQFSAGKRQFSAGKRQWVGG---DVLPEMETRQFSAGKRQFSAGKRQFSAGKRQFSAGKR-----D--ADTDILDQILNADTTEE---E  
Op\_lame ----RQFSAGKRQFSAGKRQFSAGKR-----D--ETNILDEIL--DPAADDALAE  
Op\_impr ----QFSAGKRQFSAGKRQWVGGMENPDDMLDMETRQFSAGKRQFSAGKRQFSAGKR-----D--ETNILDEILEADPAGEDALAE  
Ba\_hero\_a ----QFSAGKRQFSAGKRQWVGG---DVLPEMDTRQFSAGKRQFSAGKRQFSAGKR-----D--ETNILDEILEADPAENALSE  
Ba\_hero\_b ----QFSAGKRQFSAGKRQWVGG---DVLPEMDTRQFSAGKRQFSAGKRQFSAGKR-----D--ETNILDEILEADPAENALSE  
Op\_vivi ----QFSAGKRQFSAGKRQWVGG---DALPEMETRQFSAGKRQFSAGKRQFSAGKR-----D--ETDILDEILQAEPEAEDAFSE  
Op\_perf ----QFSAGKRQFSAGKRQWVGG---DVLPEMDTRQFSAGKRQFSAGKRQFSAGKR-----D--ETNILDEILDAEPAAANALSE  
Cl\_cana ----QFSAGKRQFSAGKRQWVGG---DVLPEMDTRQFSAGKRQFSAGKRQFSAGKR-----D--ETNILDEILEAEPAAANALSE  
Op\_exim\_1 ----QFSAGKRQFSAGKRQWVGG---DVLPEMDTRQFSAGKRQFSAGKRQFSAGKR-----D--VTNILEEILEAEPAAVDALSE  
Op\_exim\_2 ----QFSAGKRQFSAGKRQWVGG---DVLPEMDTRQFSAGKRQFSAGKRQFSAGKR-----D--VTNILEEILEAEPAAVDALSE  
Op\_liod\_a ----QFSPGKRQFSPGKRQFSPGKR-----D--ETNILDEILEAEPAAENALSE  
Op\_liod\_b ----QFSPGKRQFSPGKRQFSPGKR-----D--ETNILDEILEAEPAAENALSE  
As\_bidw ----QFSAGKRQISAGNRQWVGG---EALPEMETRQFSAGKRQFSAGKRQFSAGKR-----D--ESNILHEILNAEPAAANSLSE  
Op\_oedi ----QFSAGKRQFSAGKRQWVGG---EALPEMETRQFSAGKRQFSAGKRQFSAGKR-----D--ETNILDEILDAEPAAANSLSE  
As\_love ----QFSAGKRQWIGG---EALPEMETRQFSAGKRQFSAGKRQFSAGKR-----D--ETNILDEILAAEPAVANALSE  
Op\_john ----QWIGG---DVIPDMETRQFSAGKRQFSAGKRQFSAGKRQFSAGKRQFSAGKRQFAAGKR-----DTNILDEFLEANPAENDALSE  
Op\_lyma ----QFNPGKRQFSAGKRQWIGG---DAIPNMETRQFSAGKRQFSAGKRQFSAGKR-----D--ETNILDEILENDPAENALSE

TRH-2

Am\_cons\_2 **MLSVACVSPAILL-LSIVSVC---NTVTAEDHALTENENKYLFDRLLLNLRSSANRQKALNDLIRNYIPLDH--SARNKNVLLLEVLANLGNVPFD**  
Am\_squa **MFSVTRVSSAILLSAAVLSLW---HTASADDNALTDSENKYLFDRLLLNLRSSENRHKALNDLIRNYIPLDHSTSARNKNVLLLEVLANLGDVPFD**  
Cl\_cana -----**CVSSVLFL-LSAVSVW---STVEADDNALTDSENKYLFDRLLNLRSSENRQKALS LIRNYI PVDQ--STRNKNILLEVLANLGNVPFD**

Am\_cons\_2 FG GP-ADE-KSATGTADF-WQDD-IDDLEDN--RVNIQL---DDL**SKRWGNGPGPRGKRFAMEANSRVI**RRD**DGHGHGPGPRGKRQGPRGKKQGPR**  
Am\_squa FG GP-ADNTAAATNSED F-WKDDVADDLEET--RVNIQL---DDL**SKRWGSGPGPRGKRFATAVNSRVRRR**----**GP GPRGKRQGPRGKKQGPR**  
Cl\_cana FG GP-AEDPSVNQITQDMQWSADDFNDIESRQNL LNQL---DDL**NKRWGS GPGPRGKRF**GV EVNSRVRRR----**GP GPRGKRQGPRGKKQGPR**

Am\_cons\_2 **GKKDEEDENEYCLKNPCLQTIARTKYVCDCTEKEDPQKCQAI**VED--Q  
Am\_squa **GKKDEED**-----  
Cl\_cana **GKKEDEE**-SEFI--KPCWQTMAKKDYLCDCTNEEDPTNCQIIGGNTHK
